# Supplementary material for: Recommendations for successful sensory screening in older adults with dementia in long-term care: a qualitative environmental scan of Canadian specialists
Source: PubMed Central journal article supplement — BMJ Open. 2018 Jan 26;8(1):e019451. doi: 10.1136/bmjopen-2017-019451 (PMC5829854; doi:10.1136/bmjopen-2017-019451), 2018-01-26
Supplement: bmjopen-2017-019451.draft_revisions.pdf [file bmjopen-2017-019451.draft_revisions.pdf]

# BMJ Open

BMJ Open is committed to open peer review. As part of this commitment we make the peer review history of every article we publish publicly available.

When an article is published we post the peer reviewers' comments and the authors' responses online. We also post the versions of the paper that were used during peer review. These are the versions that the peer review comments apply to.

The versions of the paper that follow are the versions that were submitted during the peer review process. They are not the versions of record or the final published versions. They should not be cited or distributed as the published version of this manuscript.

BMJ Open is an open access journal and the full, final, typeset and author-corrected version of record of the manuscript is available on our site with no access controls, subscription charges or pay-per-view fees (<http://bmjopen.bmj.com>).

If you have any questions on BMJ Open's open peer review process please email [editorial.bmjopen@bmj.com](mailto:editorial.bmjopen@bmj.com)

# BMJ Open

## Screening for sensory impairment in older adults with dementia: Recommendations from specialists

|                                 |                                                                                                                                                                                                                                                                                                                                                                                                                          |
|---------------------------------|--------------------------------------------------------------------------------------------------------------------------------------------------------------------------------------------------------------------------------------------------------------------------------------------------------------------------------------------------------------------------------------------------------------------------|
| Journal:                        | <i>BMJ Open</i>                                                                                                                                                                                                                                                                                                                                                                                                          |
| Manuscript ID                   | bmjopen-2017-019451                                                                                                                                                                                                                                                                                                                                                                                                      |
| Article Type:                   | Research                                                                                                                                                                                                                                                                                                                                                                                                                 |
| Date Submitted by the Author:   | 04-Sep-2017                                                                                                                                                                                                                                                                                                                                                                                                              |
| Complete List of Authors:       | Wittich, Walter; Universite de Montreal, School of Optometry; Centre de recherche interdisciplinaire en readaptation du Montreal metropolitain, MAB-Mackay & Institut Nazareth et Louis-Braille<br>Hobler, Fiona; Toronto Rehabilitation Institute, Research; University of Toronto, Speech-Language Pathology<br>Jarry, Jonathan; Universite de Montreal, School of Optometry<br>McGilton, Kathy; University of Toronto |
| <b>Primary Subject Heading</b>: | Nursing                                                                                                                                                                                                                                                                                                                                                                                                                  |
| Secondary Subject Heading:      | Qualitative research, Ophthalmology, Mental health, Geriatric medicine, Ear, nose and throat/otolaryngology                                                                                                                                                                                                                                                                                                              |
| Keywords:                       | GERIATRIC MEDICINE, Protocols & guidelines < HEALTH SERVICES ADMINISTRATION & MANAGEMENT, MEDICAL EDUCATION & TRAINING, MENTAL HEALTH, Dementia < NEUROLOGY, Speech pathology < OTOLARYNGOLOGY                                                                                                                                                                                                                           |
|                                 |                                                                                                                                                                                                                                                                                                                                                                                                                          |

SCHOLARONE™  
Manuscripts

## Screening for sensory impairment in older adults with dementia:

### Recommendations from specialists

Walter Wittich<sup>1,2,3</sup>, Fiona Höbler<sup>4,5</sup>, Jonathan Jarry<sup>1,2</sup>, Kathy McGilton<sup>4,6</sup>,

1) School of Optometry, Univeristy of Montreal, Montreal, Quebec, Canada

2) CRIR/Centre de réadaptation MAB-Mackay du CIUSSS du Centre-Ouest-de-l'Île-de-Montréal

3) CRIR/Institut Nazareth et Louis-Braille du CISSS de la Montérégie-Centre

4) Department of Research, Toronto Rehabilitation Institute-University Health Network, Toronto, Ontario, Canada

5) Department of Speech-Language Pathology, University of Toronto, Toronto, Ontario, Canada

6) Lawrence S. Bloomberg Faculty of Nursing, University of Toronto, Ontario, Canada

Corresponding author:

Walter Wittich, PhD FAAO CLVT

Assistant Professor, School of Optometry Université de Montréal

3744, rue Jean-Brillant, 260-7

Montréal, (Québec) H3T 1P1

Tel. 514 343 7962; Fax. 514 343 2382

[walter.wittich@umontreal.ca](mailto:walter.wittich@umontreal.ca)

Keywords: nursing, long-term care, sensory screening, hearing loss, vision loss

Word count: 4492

## ABSTRACT

**Objectives** – This study aimed to identify screening tools, technologies, and strategies that vision- and hearing-care specialists recommend to front-line healthcare professionals for the screening of older adults in long-term care homes who have dementia.

**Setting:** An environmental scan of healthcare professionals took place via telephone interviews between December 2015 and March 2016. All interviews were audio-recorded, transcribed, proofed for accuracy, and their contents thematically analyzed by two members of the research team.

**Participants** – Eleven professionals from across Canada specializing in the fields of vision- and hearing healthcare and technology for older adults with cognitive impairment were included in the study.

**Outcome measures**– As part of a larger mixed-methods project, this qualitative study used semi-structured interviews and their subsequent content analysis.

**Results** - Following a two-step content analysis of interview data, coded citations were grouped into three main categories: 1) barriers, 2) facilitators, and 3) tools and strategies that do or do not work for sensory screening of older adults with dementia. We report on the information offered by participants within each of these themes, along with a summary of tools and strategies that work for screening older adults with dementia

**Conclusions** – Recommendations from sensory specialists to nurses working in long-term care included the need for improved inter-professional communication and collaboration, as well as flexibility, additional time, and strategic use of clinical intuition and ingenuity. These suggestions were contradicted at times the realities of service provision or the need for standardized and validated measures.

### Strengths and Limitations of this Study

- This study provides a unique opportunity for inter-professional knowledge translation by drawing on the clinical experience of experts in vision- and hearing-healthcare who specialize in providing services to older adults with dementia, in order to let nurses working in long-term care benefit from their expertise when screening for sensory impairments.
- By taking advantage of a qualitative research approach, this study is able to provide a description of directly applicable tools and strategies for sensory screening with older adults whose ability to respond to standardized traditional screening techniques may be impaired due to their cognitive limitations.
- Despite a small sample size (n = 11), the participants were from a relatively small population of vision and hearing experts with a focus on persons with dementia. In addition data saturation was reached.
- The results highlight the challenge of bridging the gap between the professional expectations of rigor and standardization in sensory assessment, and the realities of practice in a long-term care environment.

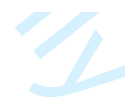

## INTRODUCTION

As we age, our sensory capacities decline, which is reflected in the increased prevalence rates of hearing and visual loss in older adults. Hearing loss has been estimated to affect up to 50% of individuals 65 years of age and older [1], and vision impairment estimated to affect 18% of those aged 70 years and over [2]. Together, vision and hearing loss, known as dual-sensory impairment (DSI), increases from a prevalence of less than 1% in persons younger than 70 years to 11.3% in adults aged 80 years or over, at which point over 80% of adults are affected by at least one sensory impairment [3]. Impaired sensory abilities are seen to be significantly more prevalent in older adults who are also experiencing cognitive decline. Indeed, hearing loss has been found in over 90% of adults with cognitive impairment [4], and visual impairment in more than 30% of individuals with dementia [5]. The most common type of dementia is Alzheimer's disease and is seen to increase dramatically in prevalence from 1.7-3% of adults aged over 65 years to 32% amongst those aged 85 years and older, and above 40% in those older than over 95 years of age [6,7]. The neurodegeneration that characterizes dementia is caused by a proliferation of the pathogenic proteins  $\beta$ -amyloid ( $A\beta$ ) and tau across neural networks including brain regions that support auditory and visual function [8–10].

Although research on the underlying relationship between cognitive and sensory decline has not reached consensus [11,12], their co-occurrence in the older population is unequivocal [13–16]; yet hearing and vision impairments continue to be under-diagnosed and under-treated in this vulnerable population of older adults with cognitive impairment [5,17].

The process of screening, assessment and evaluation of sensory and cognitive impairment in older adults has been researched in a variety of ways. Some researchers have examined how to evaluate cognition in persons who have either a hearing or a vision loss, both of which can

1  
2  
3 interfere with the administration of cognitive testing procedures [18]. For example, Bertone and  
4  
5 colleagues [19] magnified sub-tests of the Wechsler Adult Intelligence Scale [20] in order to  
6  
7 make them accessible and visible for persons with central vision loss due to age-related macular  
8  
9 degeneration. Wittich et al. [21] provided validation data for the Montreal Cognitive Assessment  
10  
11 (MoCA) [22] in its blind version, which can be administered verbally only. Similarly, Lin et al.  
12  
13 [23] developed a procedure to administer the MoCA to individuals with severe hearing  
14  
15 impairment by making the test instructions available as a PowerPoint presentation, thereby  
16  
17 avoiding problems of audibility. Other researchers have focused on the reverse of this approach,  
18  
19 whereby they examined how vision or hearing testing can be adapted to individuals with  
20  
21 cognitive decline, because many sensory tests require a response from the individual whether the  
22  
23 testing stimuli are seen or heard. It is this second approach that is the focus of the present study,  
24  
25 and how screening for sensory loss can be facilitated by nurses working in long-term care homes  
26  
27 (LTCHs).  
28  
29  
30  
31  
32

33 The decline of older adults' cognitive and functional status and the severity of their  
34  
35 disabilities are reported risk factors for institutionalization into nursing and LTCHs [24–26]. In  
36  
37 fact, the prevalence of impaired sensory capacity is disproportionately higher in people with  
38  
39 dementia living in care homes [5] than amongst older adults living in the community, with one  
40  
41 third of residents in this setting having a single sensory impairment and an additional third  
42  
43 experiencing DSI [27]. Furthermore, over half of such cases have been shown to be unreported  
44  
45 [28], with under-diagnosis by the appropriate specialist due to lack of service utilization [5] or  
46  
47 those documented being untreated due to underutilization of rehabilitative services by older  
48  
49 adults [29,30].  
50  
51  
52  
53  
54  
55  
56  
57  
58  
59  
60

1  
2  
3 The importance of appropriately identifying the sensory capacity in individuals with  
4 dementia is not only underscored by their incommensurate prevalence rates and the need to  
5 accurately determine the person's true cognitive status, but has been established as a healthcare  
6 and research priority by those living with dementia themselves [31]. Furthermore, nurses and  
7 other health care professionals responsible for the care of older adults with dementia have  
8 reported the difficulty of differentiating between sensory and cognitive impairment in affected  
9 residents [32]. Höbner et al. and others have also requested the provision of more specific  
10 education on the appropriate methods of evaluating sensory impairment amongst residents  
11 [33,34].  
12  
13  
14  
15  
16  
17  
18  
19  
20  
21  
22  
23

24 Prioritization of identifying the sensory capacity of older adults is further supported by  
25 evidence of accelerated cognitive decline [35,36] and increased risk of incident dementia in those  
26 with sensory impairment [37–39], as hearing impairment in particular can impact on all domains  
27 of cognition [11]. Moreover, residents with impairment of both vision and hearing demonstrate  
28 significantly higher incidence of new behavioral symptoms [27], and accelerated cognitive  
29 decline due to lack of social engagement [40], which is, in turn, significantly associated with  
30 untreated sensory loss [41–43]. A recent study has also shown that cognitive impairment is most  
31 common in long-term care residents with DSI and that these individuals are at increased risk of  
32 mortality [44].  
33  
34  
35  
36  
37  
38  
39  
40  
41  
42  
43

#### 44 **Objectives**

45  
46 To address the urgent need of appropriate evaluation and treatment of sensory  
47 impairment in adults already experiencing cognitive decline, we conducted an environmental  
48 scan with professionals working in the field of health technology, optometry, ophthalmology,  
49 audiology, and dual sensory impairment, which was part of a larger mixed-methods project  
50  
51  
52  
53  
54  
55  
56  
57  
58  
59  
60



1  
2  
3 investigating suitable vision and hearing screening measures for older adults with dementia that  
4 could be used by nurses working in long-term care [45]. The main purpose of this environmental  
5 scan was to identify screening tools, old and new technologies, and assessment strategies that  
6 sensory healthcare specialists find suitable for screening older adults who have dementia, and  
7 was carried out complementary to an environmental scan with nurses who work with residents  
8 who have dementia in LTCHs) [34].  
9  
10  
11  
12  
13  
14  
15

## 16 **METHODS**

17  
18  
19 Following the completion of a review of the literature on hearing and vision screening  
20 tools as per our protocol [45], this second step of the investigation was carried out in order to  
21 identify what tools, technologies and strategies are currently being used by vision and hearing  
22 professionals when serving older adults with cognitive impairment. As in the literature review, a  
23 broad definition of measures and technologies was adopted, to include paper-based tests,  
24 software solutions such as apps and extensions for mobile devices, and higher-tech devices such  
25 as portable ophthalmic or audiometric equipment, as well as informal assessment strategies used  
26 with residents who had dementia or limited cognitive or communication abilities.  
27  
28  
29  
30  
31  
32  
33  
34  
35  
36

37 The scan was conducted by a clinically trained member of the research team (FH, MSc, female),  
38 who interviewed participating professionals about: their thoughts and experiences of using tools,  
39 technologies, and strategies to screen for vision or hearing impairment in persons who have  
40 dementia, the tools and strategies they have found to be most useful, the ways in which current  
41 measures could be improved, and what they consider to be key elements for inclusion in a  
42 sensory screening package (see Table 1). This research was completed with the approval of the  
43 Research Ethics Boards of the University Health Network, Toronto, Canada, and in accordance  
44 with The Code of Ethics of the World Medical Association (Declaration of Helsinki) for  
45  
46  
47  
48  
49  
50  
51  
52  
53  
54  
55  
56  
57  
58  
59  
60

1  
2  
3 experiments involving humans [46]. All participants provided informed written consent before  
4  
5 enrolling in the study.  
6  
7  
8  
9

## 10 **PARTICIPANTS**

11  
12 A convenience sample of eleven professionals from across Canada with expertise in  
13  
14 vision, hearing, dual sensory impairment or healthcare technologies were recruited through their  
15  
16 connections with members of the larger study team or through referral by participants already  
17  
18 enrolled in or contacted about the study. The sample size was seen as sufficient for the data  
19  
20 collection purposes of this study, as judged on previous research [47,48]. The research  
21  
22 coordinator (FH) made initial contact with potential candidates by email or by phone. Eleven  
23  
24 participants agreed to take part in this study, while one candidate declined due to a perceived  
25  
26 lack of expertise in the area, and another due to time constraints during the data collection  
27  
28 period. Participant characteristics of all interviewees included in this study are summarized in  
29  
30  
31 Table 2.  
32  
33  
34  
35  
36  
37

## 38 **DATA COLLECTION**

39  
40 By use of a semi-structured guide, the environmental scan interviews took place via  
41  
42 telephone between December 2015 and March 2016. After receiving background information on  
43  
44 the study, its purpose, as well as answers to any questions they had, written informed consent  
45  
46 was received from all participants at the time of or prior to data collection via email or fax. The  
47  
48 interview protocol was applied in relevance to the participants' area of expertise (i.e., vision,  
49  
50 hearing or dual sensory loss), and participants were encouraged to offer any additional  
51  
52 information they felt was applicable to the study's objectives and/or that had not been covered by  
53  
54  
55  
56  
57  
58  
59  
60

1  
2  
3 the semi-structured interview script [49]. Two participants were interviewed together upon  
4  
5 request, resulting in a total of 10 interviews with 11 participants being conducted. There was no  
6  
7 time limit applied to the interviews, with these having a mean duration of 40 minutes 30.66  
8  
9 seconds [SD = 11.83 mins.].  
10  
11  
12  
13

## 14 **DATA ANALYSIS**

15  
16 All interviews were audio-recorded, transcribed by a third party, and proofed for  
17  
18 accuracy by a member of the research team [FH]. Following full anonymization of the data sets,  
19  
20 the transcribed contents of the interviews underwent thematic analysis [50]. Two members of the  
21  
22 research team (WW, PhD; JJ, MSc) analyzed all sets to identify data relating to the following:  
23  
24 tools/strategies that work for screening (vision/hearing), tools/strategies that do not work for  
25  
26 screening, and tools/strategies that may work. This data analysis followed a coding protocol in  
27  
28 which data was first coded as a Tool or Strategy, and secondly whether it was reported to work  
29  
30 or not, then as to whether it applied to vision or hearing screening. For example, “T+H”, which  
31  
32 denoted a measured that was reported to work well for hearing screening, or “S?V”, which  
33  
34 denoted a strategy that may work for vision. Additional codes related to information reported as:  
35  
36 a “golden quote”, a sentence or paragraph that is striking or characteristic, the name of a tool  
37  
38 when first mentioned (e.g., Snellen chart), a barrier to sensory screening, a recommendation on  
39  
40 what should be done according to the participant, other content of interest, as well as any “red  
41  
42 flag” or risk factor or other trigger for screening (e.g. diabetes, missing hearing aid, missing  
43  
44 glasses). During a second level of thematic analysis, the extracted data from the first level were  
45  
46 again analyzed for the identification of prominent themes in the interviews with participants.  
47  
48 Agreement was achieved through the concurrent coding and discussion involving both analysts  
49  
50  
51  
52  
53  
54  
55  
56  
57  
58  
59  
60

1  
2  
3 (WW, JJ), and differences in opinion when interpreting content were resolved face to face [51],  
4  
5 an approach that members of the team have previously utilized successfully [52–55]. These  
6  
7 themes are reported below.  
8  
9

## 10 FINDINGS

11  
12 Following a two-step content analysis of interview data, coded citations were grouped  
13  
14 into three main themes: 1) *barriers*, 2) *facilitators*, and 3) *tools and strategies that related to the*  
15  
16 *screening of older adults with dementia*. Here we report on the information offered by  
17  
18 participants within each of these themes. In addition, we present a summary of tools and  
19  
20 strategies that work for screening older adults with dementia (see Table 3). Direct participants'  
21  
22 quotes are presented in italics below, whereby each quote is identified by the source code.  
23  
24  
25

### 26 Facilitators

27  
28 Our interviewees identified few *facilitators*, as they were more likely to share barriers to  
29  
30 their work. The main enablers of sensory screening in residents with dementia were indeed other  
31  
32 people. The clients themselves can become facilitators and advocates, as can family members,  
33  
34 activation workers, as well as long-term care facility staff.  
35  
36

37  
38 An audiologist pointed out that hearing screening clinics in long-term care facilities can  
39  
40 be organized by a facility employee:

41  
42 *I'm thinking we could get called in to do a screening, we could have an activation worker*  
43  
44 *in a long-term care facility say, "I would like to have a hearing screening clinic." [participant*  
45  
46 *4]*  
47  
48

49  
50 Local support by staff and residents can help bring awareness of hearing loss to others:  
51  
52  
53  
54  
55  
56  
57  
58  
59  
60

1  
2  
3 *It's not always possible for me, as an audiologist, to be everywhere and see everyone, so*  
4 *to have staff members also be advocates for hearing is very important and, you know, to have*  
5 *residents themselves be advocates for hearing. [participant 5]*  
6  
7

8  
9  
10 The nurses, whose lack of availability was often branded as a barrier, were once  
11 mentioned in a more positive context:  
12

13  
14 *The nurse manager on that unit was very receptive to having some audiological*  
15 *intervention on her unit, and so we actually designed a simple screening program there,*  
16 *because she wanted the nurses to be able to do the screening [...]. And she felt that it was*  
17 *important to get the nurses on her unit involved in that screening. [participant 2]*  
18  
19  
20  
21  
22  
23  
24  
25

## 26 **Barriers**

27  
28 In the interviews with vision and hearing specialists on the subject of sensory screening in  
29 residents with a cognitive impairment, the two barriers to screening that were most often  
30 repeated were *impaired communication* and *lack of staff involvement*. Impaired communication  
31 can mean not knowing if a client's answer is reliable; not being able to use traditional means of  
32 communication; or not being able to communicate at all when the neurological condition is too  
33 advanced. One interviewee explained:  
34  
35  
36  
37  
38  
39  
40

41  
42 *And when we are at the long-term care facility, [...] some of [our residents] are*  
43 *completely unresponsive, which of course is a challenge and, other times, it's just they*  
44 *require more encouragement, constant repetition to remind them of the task that we're*  
45 *doing, that kind of thing. [participant 7]*  
46  
47  
48  
49  
50

51 Since many screening tests rely on self-report, impaired communication can jeopardize  
52 subjective assessments:  
53  
54  
55  
56  
57  
58  
59  
60

1  
2  
3 *In the more advanced stages of dementia, it's very difficult to get a pure-tone audiogram,*  
4 *because pure-tones become meaningless, so you have to use more meaningful stimuli.*

5  
6  
7  
8 *[participant 2]*  
9

10 Many sensory experts flagged the lack of staff involvement in the screening of persons  
11 for hearing and vision loss. Some reported that educating the staff on the need to screen for  
12 sensory loss was not helpful, as it is not a mandatory training activity for nurses. In part, this  
13 absence may be due to policies or regulations that do not include or promote sensory screening,  
14 lack of education and training on how to screen, or not prioritizing hearing and vision screening  
15 given the multiple demands on their time. Moreover, screening by staff is not always systematic:  
16  
17  
18  
19  
20  
21  
22

23  
24 *We did find that the nurses, number one, only bothered to do [...] their screening on 50%*  
25 *of the intake of the people that were admitted. And furthermore, failed to identify 40% of*  
26 *the people that the student identified with the more extensive screening. [participant 2]*  
27  
28  
29

30 A long list of additional barriers can be assembled based on these interviews: hearing loss  
31 denial; lack of cooperation by the client's family; discomfort vis-à-vis the physical closeness  
32 often required for sensory screening; environmental noises during hearing screening; the  
33 presence of a combined hearing and vision loss; and the limitations of portable equipment often  
34 necessary for these on-location screenings.  
35  
36  
37  
38  
39  
40  
41

## 42 **Strategies and Tools**

43

44 Given the specific characteristics of people with a cognitive impairment, our specialists  
45 frequently suggested *strategies* to conduct sensory screening. We defined these as adaptations or  
46 behavioural accommodations in order to administer a particular screening tool, such as choosing  
47 a specific location or speed of administration. While certain strategies were unique to either  
48 vision or hearing screening, many such adaptations were mentioned by both groups of experts.  
49  
50  
51  
52  
53  
54  
55  
56  
57  
58  
59

1  
2  
3 By far the most common strategy was to *improve communication*. Many specialists highlighted  
4 the importance of establishing a friendly rapport with the client before screening, of reassuring  
5 and encouraging them throughout the procedure. Sometimes, repetition was key:  
6  
7  
8

9  
10 *They require more encouragement, constant repetition to remind them of the task that*  
11 *we're doing. [participant 7]*  
12  
13

14 Often, according to our interviewees, the client may not provide the type of feedback  
15 traditionally required by the subjective screen, emphasizing the value of flexibility. The response  
16 to “Can you see this?” or “Can you hear this?” can be a smile, a number of raised fingers, or a  
17 movement of the eye:  
18  
19  
20  
21  
22

23  
24 *I remember one woman that was singing constantly, but she would stop singing when she*  
25 *could hear me, so that was one way of finding information. [participant 2]*  
26  
27

28 It may also mean playing along with a resident’s own understanding of the situation:  
29

30 *One man believed he was being assessed to join the Greek military and so he was reading*  
31 *all of the letters on the Snellen chart in Greek. And I don't speak Greek and so we also*  
32 *bring a number chart with us. So, he was reading those out in Greek but at least there*  
33 *were only nine numbers for me memorize. So, I just started accepting Greek readings of*  
34 *the numbers instead and kind of learning Greek numeric system as we went. [participant*  
35 *10]*  
36  
37  
38  
39  
40  
41  
42  
43

44 The *preference for familiarity* was a recurring strategy mentioned by both hearing and  
45 vision specialists, such as choosing a familiar room and having a person the client trusts sitting  
46 by their side during the screening. Considerations of *time* were brought up as well: examples  
47 included screening on the right day, with breaks during the procedure, and the possibility of  
48 resting or finishing another day:  
49  
50  
51  
52  
53  
54  
55  
56  
57  
58  
59  
60

1  
2  
3 *Sometimes the assessment needs to be done over several appointments [participant 5].*

4  
5 Finally, information can be gathered indirectly through *staff, family, and behaviour*. The  
6  
7 latter, we were told, can serve as a clue to impairment:

8  
9  
10 *One of the most helpful things is having family there to at least give us a little bit of*  
11  
12 *background about the resident, about things that they may have liked to have done when*  
13  
14 *they were not at the long-term care facility such as reading or knitting, activities that they*  
15  
16 *haven't been doing lately which could be because of their vision problems, either glasses*  
17  
18 *or having some sort of eye condition that needs to be treated. [participant 3]*

19  
20  
21 A small number of strategies were mentioned exclusively by vision specialists, while a  
22  
23 much longer list could be drawn from the input of the hearing experts (see Table 3). Since  
24  
25 hearing screening often relies on the playback of tones through headphones, it is interesting to  
26  
27 note that interviewees disagreed amongst themselves as to whether or not ear buds were  
28  
29 preferable to headsets for this population. Some clients may prefer the former:

30  
31  
32  
33 *If you come at somebody with a headset, often that's a bit alarming and they immediately*  
34  
35 *don't want to cooperate; but I've found that they're more compliant with insert phones.*  
36  
37 *[participant 2]*

38  
39 while others are more at ease with the latter:

40  
41  
42 *I haven't had issues with people putting on headsets. [...] I'm not sold on removing the*  
43  
44 *idea of a headset." [participant 4]*

45  
46  
47 The above-mentioned strategies highlight that no one method of screening works for  
48  
49 everyone as some residents preferred headsets while others preferred phones. For both vision and  
50  
51 hearing, experts spoke of numerous tools they considered either to work, to not work, or to  
52  
53 possibly work with this population (see Table 3). On the hearing side, speech testing was often  
54  
55



1  
2  
3 mentioned as providing more meaningful stimuli to a client with a cognitive impairment than a  
4  
5 pure-tone audiogram: indeed, the latter test ended up both being recommended and being  
6  
7 rejected depending on the interviewee. Meanwhile, for either sense, very few of our participants  
8  
9 qualified themselves as knowledgeable on the topic of screening apps, such as Peek™ for vision  
10  
11 testing. They often knew of these portable technologies but had rarely used them. These apps  
12  
13 elicited the following concerns: that they were not designed or validated for use in a context of  
14  
15 dementia; that they relied on batteries that need to be recharged; and that the hardware (i.e. cell  
16  
17 phone or tablet screen and camera) is not professional grade. Still, many interviewees wanted to  
18  
19 see data on how they compared to traditional screening methods and were even willing to try  
20  
21 them out for themselves.  
22  
23  
24

25  
26 A recurring comment on the part of audiologists spanned multiple coding categories,  
27  
28 acting as a barrier, forming a recommendation, and being suggested as a screening tool that  
29  
30 works for hearing: the *presence of wax* and its removal through otoscopy. As one hearing expert  
31  
32 put it:  
33  
34

35 *I think all screening should be accompanied by otoscopic examination, because one other*  
36  
37 *thing I've learned is that many seniors, especially those in the nursing homes, they don't*  
38  
39 *tend to get kind of routine ear exams, tend to have accumulations of wax that would*  
40  
41 *definitely be possibly interfering with their hearing. So having that wax removed before*  
42  
43 *you do any testing, is really important. [...] Anybody who's getting involved with*  
44  
45 *screening of seniors' hearing needs to have some training in cerumen management,*  
46  
47 *certainly. [participant 2]*  
48  
49  
50  
51  
52

## 53 DISCUSSION

54  
55  
56  
57  
58  
59  
60

1  
2  
3 The purpose of the present study was to explore the advice of specialists in the field of  
4 sensory health care for older adults with dementia, in order to develop recommendations for  
5 nurses working in long-term care facilities to be able to better screen their residents for the  
6 presence of vision and/or hearing loss. The participants reported on several facilitators and  
7 barriers, and how these can each be strengthened and overcome through adaptive strategies.  
8 Ideally, a screening protocol would be able to examine vision and hearing function  
9 simultaneously or during the same testing opportunity, because time is often sparse and the  
10 pressures on health care providers are many. However, one central theme, common among the  
11 suggested approaches, was to allow and encourage clients (and clinicians) to take their time  
12 when engaging in the testing of sensory functioning, as subtle information and behavioural cues  
13 often become the true source of information in sensory screening, and may then be lost if  
14 rigorously standardized (and fast) protocols are adhered to.

15  
16  
17  
18  
19  
20  
21  
22  
23  
24  
25  
26  
27  
28  
29  
30  
31 In this particular population, sensory screening methods need to be flexible enough to  
32 accommodate a range of cognitive resources, whereby individuals with mild cognitive  
33 impairments may well be able to complete normal testing procedures if given the chance and the  
34 time. Those with moderate to severe cognitive impairment, however, may require adjustments in  
35 the administration of screening measures and strategies, led by use of clinical judgment and  
36 intuition. Such approaches can easily be supplemented with the use of questionnaires (or a  
37 subsection of questions therein), as well as more objective measures in order to ensure reliability  
38 of test results. Ideally, the stimuli that are used are meaningful to the resident (e.g., their name)  
39 and are speech-based because of their ecological importance over pure tones. When simplicity  
40 was important, the use of numbers (both for speech as well as vision testing) was recommended.  
41  
42  
43  
44  
45  
46  
47  
48  
49  
50  
51  
52  
53  
54 In addition, the use of pictograms or picture-matching was a proposed possibility to elicit  
55  
56  
57  
58  
59  
60

1  
2  
3 responses. In addition, making sure the methods of screening aligned with the residents  
4 preferences (phones or headsets) is essential for a quality screening result. Finally, our  
5 respondents expressed openness to using and exploring the potential of new technologies, such  
6 as apps and devices, for screening purposes. However, their own experience with current  
7 technologies was limited and they expressed concerns about their validity and availability, thus,  
8 recommending that technologies require further development in order to serve this population.  
9  
10  
11  
12  
13  
14  
15

16  
17 A strength of the present study is its range of professionals and their level of expertise in  
18 providing services to older adults with sensory and cognitive impairments; despite their number  
19 being relatively small, data saturation was reached when assessed. In addition, this study tackles  
20 cross-disciplinary communication barriers by bringing specialist recommendations to the  
21 attention of nurses. We were able to replicate previous reports on the barriers and challenges that  
22 are encountered when providing sensory care to older adults in LTCHs, including difficulties in  
23 client's willingness to participate in the assessment (at times expressed as aggression or anxiety)  
24 as well as communication difficulties linked to cognitive losses, resulting in confusion (both at  
25 the part of the client and the clinician) [33]. Communication recommendations were in line with  
26 previous suggestions to adjust speech volume, speed, and body positioning face-to-face [32]. In  
27 addition, the present data are in agreement with previous reports about the necessity for  
28 flexibility in the testing procedure, such as the need to determine the optimal time of day for each  
29 individual to be tested, the option to pause and continue testing as needed, along with taking care  
30 to avoid fatigue or frustration on the part of the client [56].  
31  
32  
33  
34  
35  
36  
37  
38  
39  
40  
41  
42  
43  
44  
45  
46  
47  
48

49 A remaining challenge, however, is to reconcile the realities of nurses workloads in  
50 LTCHs with the recommendations that have emerged from our specialist interviews.  
51 Specifically, the recommendations of our vision and hearing care professionals are likely to go  
52  
53  
54  
55  
56  
57  
58  
59  
60

1  
2  
3 beyond the resources available. Even though both groups agree that increased priority should be  
4 placed on the sensory assessment of residents in order to improve communication [43], the  
5 reality of service provision in LTCHs rarely allows for this level of individualized attention [57].  
6  
7 For nurses working in LTCHs, the impact of regulations on nurse role flexibility and professional  
8 judgment and an underfunded system contributing to insufficient resources and staffing [48] which  
9 influences their ability to find time and resources to screen effectively. In addition, the technologies,  
10 tools and abilities available versus the devices, techniques and skills that were recommended  
11 may not match. For example, LTCH nurses may not have access to the necessary tools and  
12 training to remove earwax, a potentially necessary step before hearing can truly be evaluated.  
13  
14 Similarly, pocket-sized eye charts may be necessary for vision screening, but may not  
15 necessarily be available to all staff at any time, or staff may lack training to properly administer  
16 and interpret the results when presenting the test at a specific distance or under non-optimal  
17 lighting conditions. Meanwhile, some of the tests that may be known and available to nurses may  
18 not hold up to the demands of rigor for sensory testing by the specialists. For example, the use of  
19 measures such as the Whisper test and Finger Rub test that are evidenced as suitable tests in the  
20 literature [58] did not find the approval of the specialists in our study, given problems with  
21 standardization and validation.  
22  
23  
24  
25  
26  
27  
28  
29  
30  
31  
32  
33  
34  
35  
36  
37  
38  
39  
40

41  
42 The next steps in the development of a sensory screening tool for older adults with  
43 dementia will include the integration of nurses' recommendations [34] with recommendations  
44 from the experts who were interviewed for this environmental scan, as well as the results of a  
45 systematic review of the literature on this topic. The members of this research team will then  
46 develop and pilot test a screening tool for nurses to use in the LTCH to examine its feasibility,  
47 reliability and validity. The present data indicate that strategies and training in easy-to-use  
48 methods, as well as careful client observation, may play a prominent role in such a screening  
49  
50  
51  
52  
53  
54  
55  
56  
57  
58  
59  
60

1  
2  
3 tool. It is also possible that these methods and adaptive strategies may take shape in a new  
4  
5 technological application, which can be incorporated into portable devices such as cellphones or  
6  
7 a tablet computer - both technologies that are becoming more available in the clinical  
8  
9 environment [59,60]. Mandated training on the use of such a screening tool and continuous  
10  
11 efforts in knowledge translation would ensure its success, especially given its potential for far-  
12  
13 reaching benefits to clients and clinicians alike in their care provision and interaction in LTCHs.  
14  
15  
16  
17  
18  
19  
20  
21  
22  
23  
24  
25  
26  
27  
28  
29  
30  
31  
32  
33  
34  
35  
36  
37  
38  
39  
40  
41  
42  
43  
44  
45  
46  
47  
48  
49  
50  
51  
52  
53  
54  
55  
56  
57  
58  
59  
60

1  
2  
3 **Contributors:** KSMcG is responsible for project conception and along with FH and WW for  
4 writing the protocol. FH, KSMcG and WW obtained ethics approval. FH collected the data. WW  
5 and JJ conducted the data analysis. WW, FH, JJ and KSMcG were involved in data  
6 interpretation, writing, editing and revising the manuscript.  
7  
8  
9  
10  
11  
12  
13

14 **Competing interests:** none declared  
15  
16  
17  
18

19 **Funding:** This work was supported by the Alzheimer Society Research Programme (ASRP),  
20 Alzheimer Society of Canada; grant number RG 16-08. WW is supported by an FRQ-S Junior 1  
21 career award (# 28881 & 30620).  
22  
23  
24  
25  
26  
27

28 **Data sharing statement:** Access to the raw qualitative data is available upon request, given  
29 appropriate ethics approval.  
30  
31  
32  
33  
34  
35  
36  
37  
38  
39  
40  
41  
42  
43  
44  
45  
46  
47  
48  
49  
50  
51  
52  
53  
54  
55  
56  
57  
58  
59  
60

## References:

- 1 Cruickshanks K, Wiley T, Tweed B, *et al.* The prevalence of hearing loss in older adults in Beaver Dam, Wisconsin: The epidemiology of hearing loss study. *Am J Epidemiol* 1998;**148**:879–85.
- 2 Crews JE, Campbell VA, John E, *et al.* Vision impairment and hearing loss among community-dwelling older Americans: implications for health and functioning. *Am J Public Health* 2004;**94**:823–9.
- 3 Swenor BK, Ramulu PY, Willis JR, *et al.* The Prevalence of Concurrent Hearing and Vision Impairment in the United States. *JAMA Intern Med* 2013;**173**:1–5. doi:10.1001/jamainternmed.2013.1880.The
- 4 Gold M, Lightfoot LA, Hnath-Chisolm T. Hearing loss in a memory disorders clinic. A specially vulnerable population. *Arch Neurol* 1996;**53**:922–8.
- 5 Bowen M, Edgar DF, Hancock B, *et al.* *The Prevalence of Visual Impairment in People with Dementia (the PrOVIDe study): a cross-sectional study of people aged 60–89 years with dementia and qualitative exploration of individual, carer and professional perspectives.* NIHR Journals Library 2016. doi:10.3310/HSDR04210
- 6 Prince M, Knapp M, Guerchet M, *et al.* *Dementia UK: Update.* London, UK: 2014.
- 7 Hebert LE, Weuve J, Scherr PA, *et al.* Alzheimer disease in the United States (2010–2050) estimated using the 2010 census. *Neurology* 2013;**80**:1778–83. doi:10.1212/WNL.0b013e31828726f5
- 8 Hardy CJD, Marshall CR, Golden HL, *et al.* Hearing and dementia. *J Neurol* 2016;**263**:2339–54. doi:10.1007/s00415-016-8208-y
- 9 Cronin-Golomb A, Corkin S, Growdon JH. Visual dysfunction predicts cognitive deficits in Alzheimer’s disease. *Optom Vis Sci* 1995;**72**:168–76.
- 10 Mentis MJ, Horwitz B, Grady CL, *et al.* Visual cortical dysfunction in Alzheimer’s disease evaluated with a temporally graded ‘stress test’ during PET. *Am J Psychiatry* 1996;**153**:32–40. doi:10.1176/ajp.153.1.32
- 11 Taljaard DS, Olaithe M, Brennan-Jones CG, *et al.* The relationship between hearing impairment and cognitive function: a meta-analysis in adults. *Clin Otolaryngol* 2016;**41**:718–29. doi:10.1111/coa.12607
- 12 Wayne R V, Johnsrude IS. A review of causal mechanisms underlying the link between age-related hearing loss and cognitive decline. *Ageing Res Rev* 2015;**23**:154–66. doi:10.1016/j.arr.2015.06.002
- 13 Nirmalasari O, Mamo SK, Nieman CL, *et al.* Age-related hearing loss in older adults with cognitive impairment. *Int Psychogeriatrics* 2017;**29**:115–21. doi:10.1017/S1041610216001459
- 14 Armstrong R, Kergoat H. Oculo-visual changes and clinical considerations affecting older patients with dementia. *Ophthalmic Physiol Opt* 2015;**35**:352–76. doi:10.1111/opo.12220
- 15 Petitot C, Perrot X, Collet L, *et al.* [Alzheimer’s disease, hearing impairment and hearing-aids: a review]. *Psychol Neuropsychiatr Vieil* 2007;**5**:121–5.
- 16 Frost S, Martins RN, Kanagasigam Y. Ocular Biomarkers for Early Detection of Alzheimer’s Disease. *J Alzheimer’s Dis* 2010;**22**:1–16. doi:10.3233/JAD-2010-100819
- 17 Allen NH, Burns A, Newton V, *et al.* The effects of improving hearing in dementia. *Age Ageing* 2003;**32**:189–93.
- 18 Pye A, Charalambous AP, Leroi I, *et al.* Screening tools for the identification of dementia



- for adults with age-related acquired hearing or vision impairment: a scoping review. *Int Psychogeriatrics* 2017;:1–14. doi:10.1017/S104161021700120X
- 19 Bertone A, Wittich W, Watanabe D, *et al*. The effect of age-related macular degeneration on non-verbal neuropsychological test performance. In: Jones S, MacDonald P, eds. *Elsevier International Conference Series*. London, UK: : Elsevier 2005. 26–30.
- 20 Wechsler D. *WAIS-III: Wechsler Adult Intelligence Scale (3rd ed.) Administration and Scoring Manual*. San Antonio, TX: : Psychological Corporation/Harcourt Brace 1997.
- 21 Wittich W, Phillips N, Nasreddine ZS, *et al*. Sensitivity and Specificity of the Montreal Cognitive Assessment Modified for Individuals Who Are Visually Impaired. *J Vis Impair Blind* 2010;**104**:360–8.
- 22 Nasreddine ZS, Phillips NA, Bedirian V, *et al*. The Montreal Cognitive Assessment, MoCA: a brief screening tool for mild cognitive impairment. *J Am Geriatr Soc* 2005;**53**:695–9.
- 23 Lin VYW, Chung J, Callahan BL, *et al*. Development of cognitive screening test for the severely hearing impaired: Hearing-impaired MoCA. *Laryngoscope* 2017;**127**:S4–11. doi:10.1002/lary.26590
- 24 Hébert R, Dubois MF, Wolfson C, *et al*. Factors associated with long-term institutionalization of older people with dementia: data from the Canadian Study of Health and Aging. *J Gerontol A Biol Sci Med Sci* 2001;**56**:M693-9.
- 25 Severson MA, Smith GE, Tangalos EG, *et al*. Patterns and predictors of institutionalization in community-based dementia patients. *J Am Geriatr Soc* 1994;**42**:181–5.
- 26 Steele C, Rovner B, Chase GA, *et al*. Psychiatric symptoms and nursing home placement of patients with Alzheimer's disease. *Am J Psychiatry* 1990;**147**:1049–51. doi:10.1176/ajp.147.8.1049
- 27 Yamada Y, Vlachova M, Richter T, *et al*. Prevalence and Correlates of Hearing and Visual Impairments in European Nursing Homes: Results From the SHELTER Study. *J Am Med Dir Assoc* 2014;**15**:738–43. doi:10.1016/j.jamda.2014.05.012
- 28 Sinoo MM, Kort HSM, Duijnste MSH. Visual functioning in nursing home residents: information in client records. *J Clin Nurs* 2012;**21**:1913–21. doi:10.1111/j.1365-2702.2012.04128.x
- 29 Wattamwar K, Qian ZJ, Otter J, *et al*. Increases in the Rate of Age-Related Hearing Loss in the Older Old. *JAMA Otolaryngol Neck Surg* 2017;**143**:41. doi:10.1001/jamaoto.2016.2661
- 30 Overbury O, Wittich W. Barriers to low vision rehabilitation: the Montreal Barriers Study. *Investig Ophthalmol Vis Sci* 2011;**52**:8933–8. doi:10.1167/iovs.11-8116
- 31 The College of Optometrists. The Visual Impairment and Dementia Summit. 2016.
- 32 Slaughter SE, Hopper T, Ickert C, *et al*. Identification of hearing loss among residents with dementia: Perceptions of health care aides. *Geriatr Nurs (Minneap)* 2014;**35**:434–40. doi:10.1016/j.gerinurse.2014.07.001
- 33 Labreche T, Stolee P, McLeod J. An optometrist-led eye care program for older residents of retirement homes and long-term care facilities. *Can Geriatr J* 2011;**14**:8–11.
- 34 Höbler F, Argueta-Warden X, Rodríguez Monforte M, *et al*. Exploring the sensory screening experiences of nurses working in long-term care homes with residents who have dementia: a qualitative study. under review.
- 35 Humes LE, Busey TA, Craig J, *et al*. Are age-related changes in cognitive function driven



- 1  
2  
3 by age-related changes in sensory processing? *Attention, Perception, Psychophys*  
4 2013;**75**:508–24. doi:10.3758/s13414-012-0406-9
- 5  
6 36 Lin F, Yaffe K, Xia J, *et al.* Hearing Loss and Cognitive Decline in Older Adults. *JAMA*  
7 *Intern Med* 2013;**173**:293. doi:10.1001/jamainternmed.2013.1868
- 8 37 Lin F, Albert M. Hearing loss and dementia – who is listening? *Aging Ment Health*  
9 2014;**18**:671–3. doi:10.1080/13607863.2014.915924
- 10 38 Gallacher J, Ilubaera V, Ben-Shlomo Y, *et al.* Auditory threshold, phonologic demand,  
11 and incident dementia. *Neurology* 2012;**79**:1583–90.  
12 doi:10.1212/WNL.0b013e31826e263d
- 13 39 Lin F, Metter EJ, O’Brien RJ, *et al.* Hearing loss and incident dementia. *Arch Neurol*  
14 2011;**68**:214–20. doi:10.1001/archneurol.2010.362
- 15 40 Yamada Y, Denking MD, Onder G, *et al.* Dual Sensory Impairment and Cognitive  
16 Decline: The Results From the Shelter Study. *Journals Gerontol Ser A Biol Sci Med Sci*  
17 2015;**71**:1–7. doi:10.1093/gerona/glv036
- 18 41 Parfyonov M, Mick P, Pichora-Fuller M, *et al.* Association between sensory loss and  
19 social outcomes: A preliminary report. *Can Acoust* 2016;**44**:124–5.
- 20 42 Mick P, Pichora-Fuller MK. Is Hearing Loss Associated with Poorer Health in Older  
21 Adults Who Might Benefit from Hearing Screening? *Ear Hear* 2016;**37**:e194–201.  
22 doi:10.1097/AUD.0000000000000267
- 23 43 Pryce H, Goberman-Hill R. ‘There’s a hell of a noise’: living with a hearing loss in  
24 residential care. *Age Ageing* 2012;**41**:40–6. doi:10.1093/ageing/afr112
- 25 44 Mitoku K, Masaki N, Ogata Y, *et al.* Vision and hearing impairments, cognitive  
26 impairment and mortality among long-term care recipients: a population-based cohort  
27 study. *BMC Geriatr* 2016;**16**:112. doi:10.1186/s12877-016-0286-2
- 28 45 McGilton KS, Höbler F, Campos J, *et al.* Hearing and vision screening tools for long-term  
29 care residents with dementia: protocol for a scoping review. *BMJ Open* 2016;**6**:e011945.  
30 doi:10.1136/bmjopen-2016-011945
- 31 46 Williams JR. The Declaration of Helsinki and public health. *Bull World Health Organ*  
32 2008;**86**:650–1.
- 33 47 Sibbald SL, McPherson C, Kothari A. Ontario primary care reform and quality  
34 improvement activities: an environmental scan. *BMC Health Serv Res* 2013;**13**:209.  
35 doi:10.1186/1472-6963-13-209
- 36 48 McGilton KS, Boscart VM, Brown M, *et al.* Making tradeoffs between the reasons to  
37 leave and reasons to stay employed in long-term care homes: Perspectives of licensed  
38 nursing staff. *Int J Nurs Stud* 2014;**51**:917–26. doi:10.1016/j.ijnurstu.2013.10.015
- 39 49 Whiting LS. Semi-structured interviews: guidance for novice researchers. *Nurs Stand*  
40 2008;**22**:35–40. doi:10.7748/ns2008.02.22.23.35.c6420
- 41 50 Graneheim UH, Lundman B. Qualitative content analysis in nursing research: concepts,  
42 procedures and measures to achieve trustworthiness. *Nurse Educ Today* 2004;**24**:105–12.  
43 doi:10.1016/j.nedt.2003.10.001
- 44 51 Hall W a, Long B, Bermbach N, *et al.* Qualitative teamwork issues and strategies:  
45 coordination through mutual adjustment. *Qual Health Res* 2005;**15**:394–410.  
46 doi:10.1177/1049732304272015
- 47 52 Wittich W, Southall K. Coping with extended facedown positioning after macular hole  
48 surgery: a qualitative diary analysis. *Nurs Res* 2008;**57**:436–43.
- 49 53 Wittich W, Barstow EA, Jarry J, *et al.* Screening for sensory impairment in older adults:  
50  
51  
52  
53  
54  
55  
56  
57  
58  
59  
60

- 1  
2  
3 Training and practice of occupational therapists in Quebec. *Can J Occup Ther*  
4 2015;**82**:283–93. doi:10.1177/0008417415573076  
5  
6 54 Wittich W, Jarry J, Barstow E, *et al.* Vision and hearing impairment and occupational  
7 therapy education: Needs and current practice. *Br J Occup Ther* 2017;:30802261668485.  
8 doi:10.1177/0308022616684853  
9  
10 55 Wittich W, Jarry J, Groulx G, *et al.* Rehabilitation and Research Priorities in  
11 Deafblindness for the Next Decade. *J Vis Impair Blind* 2016;**110**:219–31.  
12  
13 56 Kergoat H, Law C, Chriqui E, *et al.* Tool for Screening Visual Acuity in Older Individuals  
14 With Dementia. *Am J Alzheimer's Dis Other Dementias*® 2017;**32**:96–100.  
15 doi:10.1177/1533317517689877  
16  
17 57 Viau-Guay A, Bellemare M, Feillou I, *et al.* Person-Centered Care Training in Long-Term  
18 Care Settings: Usefulness and Facility of Transfer into Practice. *Can J Aging / La Rev Can*  
19 *du Vieil* 2013;**32**:57–72. doi:10.1017/S0714980812000426  
20  
21 58 Strawbridge WJ, Wallhagen MI. Simple Tests Compare Well with a Hand-held  
22 Audiometer for Hearing Loss Screening in Primary Care. *J Am Geriatr Soc* Published  
23 Online First: 11 August 2017. doi:10.1111/jgs.15044  
24  
25 59 Berkowitz SJ, Kung JW, Eisenberg RL, *et al.* Resident iPad Use: Has It Really Changed  
26 the Game? *J Am Coll Radiol* 2014;**11**:180–4. doi:10.1016/j.jacr.2013.04.017  
27  
28 60 Lehnbohm EC, Adams K, Day RO, *et al.* iPad use during ward rounds: an observational  
29 study. *Stud Health Technol Inform* 2014;**204**:67–73.  
30  
31  
32  
33  
34  
35  
36  
37  
38  
39  
40  
41  
42  
43  
44  
45  
46  
47  
48  
49  
50  
51  
52  
53  
54  
55  
56  
57  
58  
59  
60

**Table 1: Interview Questions**

- Do you administer hearing and vision screening tests to residents at this facility?
- How long have you been working with persons who have dementia?
- Please describe your experience of working with persons who have dementia, as well as persons with hearing and vision loss.
- How do you differentiate between residents who have difficulty understanding due to a hearing impairment and those with cognitive impairments?
- How are residents identified as being in need of assessment for vision and hearing impairment?
  - Is there a standard procedure in place, and, if so, what are the steps?
  - What is the procedure for referring residents to a hearing and/or vision specialist?
- What tools, technologies, and strategies are you currently using to assess and/or detect vision and/or hearing in persons who have dementia?
- What approach is used or do you use in assessing persons who have dementia e.g. what combination of tools, technologies, and strategies is being implemented?
- How do these tools, technologies, and strategies identify a person as having hearing and/or vision impairments?
- What are the facilitators and barriers in implementing this approach and/or procedure?
  - Please list all the challenges in using these tools, technologies, and strategies.
  - Please also list all the benefits to using these tools, technologies, and strategies.
- In what way can these tools, technologies, and strategies be improved?
- In your opinion, what are the key elements to include in a hearing and vision screening package for persons who have dementia?
- Do you have knowledge of or experience in using either of the following:
  - **Peek** application (turns a smartphone into an eye exam tool)?  
...or similar other apps?
  - **uHear** application (downloadable audiometer on to an iPod Touch as a test for hearing loss)?  
...or similar other apps?

**Table 2: Summary of Participant Characteristics (N=11)**

|                                                  | <b>N</b> | <b>[%]</b>  |
|--------------------------------------------------|----------|-------------|
| <b>Categorical Characteristics</b>               |          |             |
| Audiologist                                      | 2        | 18          |
| Optometrist                                      | 4        | 36          |
| Speech-Language Pathologist                      | 1        | 9           |
| Dual-sensory specialist                          | 2        | 18          |
| Hearing counsellor                               | 1        | 9           |
| Health technology specialist                     | 1        | 9           |
| Female                                           | 10       | 91          |
| <b>Continuous Characteristics</b>                |          |             |
| Years' experience working in dementia care (N=8) | 14.56    | [SD= 12.03] |

|            | HEARING SCREENING                                                                                                                                                                                                                                                                                                                                                                                                                                                                                                                                                                                                                                                                                                                                                                                                                                                                                                                                                                                                                                                                                                                                                                                                    | VISION SCREENING                                                                                                                                                                                                                                                                                                                                                                                                                                                                          |
|------------|----------------------------------------------------------------------------------------------------------------------------------------------------------------------------------------------------------------------------------------------------------------------------------------------------------------------------------------------------------------------------------------------------------------------------------------------------------------------------------------------------------------------------------------------------------------------------------------------------------------------------------------------------------------------------------------------------------------------------------------------------------------------------------------------------------------------------------------------------------------------------------------------------------------------------------------------------------------------------------------------------------------------------------------------------------------------------------------------------------------------------------------------------------------------------------------------------------------------|-------------------------------------------------------------------------------------------------------------------------------------------------------------------------------------------------------------------------------------------------------------------------------------------------------------------------------------------------------------------------------------------------------------------------------------------------------------------------------------------|
| TOOLS      | <ul style="list-style-type: none"> <li>▪ "Hear Mans" (manikin head with headphones on used for a quick hearing test)</li> <li>▪ Asking simple questions (does the patient wear hearing aids? does the patient have them?)</li> <li>▪ Chart review</li> <li>▪ Five-minute hearing test</li> <li>▪ Hearing Dependent Daily Activities questionnaire</li> <li>▪ Otoacoustic emissions</li> <li>▪ Picture board</li> <li>▪ Pocket Talker (how the person responds to using it)</li> <li>▪ Pure-tone audiology</li> <li>▪ Questionnaire devised by a former student of the interviewee's</li> <li>▪ Repeating numbers</li> <li>▪ Speech testing</li> <li>▪ Whisper test and finger rub</li> </ul>                                                                                                                                                                                                                                                                                                                                                                                                                                                                                                                         | <ul style="list-style-type: none"> <li>▪ Auto-refractor</li> <li>▪ Case history</li> <li>▪ Finger counting</li> <li>▪ Health questionnaire</li> <li>▪ Matching game</li> <li>▪ Objective measures (prescription assessment, eye exam)</li> <li>▪ Sentences on a board in different sized font</li> <li>▪ Vision questionnaire</li> <li>▪ Visual charts (letters, numbers, sentences, single words, pictures, tumbling Es)</li> </ul>                                                      |
| STRATEGIES | <ul style="list-style-type: none"> <li>▪ Alternating between testing the left and right ear until you get an answer if no initial response to pitch testing</li> <li>▪ Applying techniques developed for screening in children</li> <li>▪ Asking basic questions as a form of hearing screening</li> <li>▪ Bowing out of the screening gracefully if it could not be finished</li> <li>▪ Choosing more meaningful stimuli than pure tones</li> <li>▪ Choosing "pulsing beeps" instead of "single beeps" on the audiometer</li> <li>▪ Choosing a quiet room</li> <li>▪ Educating nurses and doctors on the importance of hearing and screening</li> <li>▪ Frequently encouraging the client</li> <li>▪ Gradually reducing the level of stimulus presentation to find their threshold</li> <li>▪ Repeating measurements to ensure reliability of client self-report</li> <li>▪ Rephrasing screening questions to avoid denial of the problem</li> <li>▪ Starting with speech testing</li> <li>▪ Taking breaks as needed</li> <li>▪ Using a headset instead of ear buds</li> <li>▪ Using ear buds instead of a headset</li> <li>▪ Using sound amplification (e.g. Pocket Talker) to facilitate communication</li> </ul> | <ul style="list-style-type: none"> <li>▪ Bringing the eye chart closer than normal</li> <li>▪ Distributing a vision form for caregiver to request exam or to help staff look at changes that would warrant a screening</li> <li>▪ Emphasizing that the purpose of the screening is to monitor the health of the individual</li> <li>▪ Respecting their autonomy during the screening</li> <li>▪ Staying away from the patient and moving around them with portable instruments</li> </ul> |

## COREQ (CONsolidated criteria for REporting Qualitative research) Checklist

A checklist of items that should be included in reports of qualitative research. You must report the page number in your manuscript where you consider each of the items listed in this checklist. If you have not included this information, either revise your manuscript accordingly before submitting or note N/A.

| Topic                                          | Item No. | Guide Questions/Description                                                                                                                              | Reported on Page No. |
|------------------------------------------------|----------|----------------------------------------------------------------------------------------------------------------------------------------------------------|----------------------|
| <b>Domain 1: Research team and reflexivity</b> |          |                                                                                                                                                          |                      |
| <i>Personal characteristics</i>                |          |                                                                                                                                                          |                      |
| Interviewer/facilitator                        | 1        | Which author/s conducted the interview or focus group?                                                                                                   | 7                    |
| Credentials                                    | 2        | What were the researcher's credentials? E.g. PhD, MD                                                                                                     | 7                    |
| Occupation                                     | 3        | What was their occupation at the time of the study?                                                                                                      | 7                    |
| Gender                                         | 4        | Was the researcher male or female?                                                                                                                       | 7                    |
| Experience and training                        | 5        | What experience or training did the researcher have?                                                                                                     | 7                    |
| <i>Relationship with participants</i>          |          |                                                                                                                                                          |                      |
| Relationship established                       | 6        | Was a relationship established prior to study commencement?                                                                                              | 7                    |
| Participant knowledge of the interviewer       | 7        | What did the participants know about the researcher? e.g. personal goals, reasons for doing the research                                                 | 7                    |
| Interviewer characteristics                    | 8        | What characteristics were reported about the interviewer/facilitator? e.g. Bias, assumptions, reasons and interests in the research topic                | 7                    |
| <b>Domain 2: Study design</b>                  |          |                                                                                                                                                          |                      |
| <i>Theoretical framework</i>                   |          |                                                                                                                                                          |                      |
| Methodological orientation and Theory          | 9        | What methodological orientation was stated to underpin the study? e.g. grounded theory, discourse analysis, ethnography, phenomenology, content analysis | 7                    |
| <i>Participant selection</i>                   |          |                                                                                                                                                          |                      |
| Sampling                                       | 10       | How were participants selected? e.g. purposive, convenience, consecutive, snowball                                                                       | 7                    |
| Method of approach                             | 11       | How were participants approached? e.g. face-to-face, telephone, mail, email                                                                              | 7                    |
| Sample size                                    | 12       | How many participants were in the study?                                                                                                                 | 7                    |
| Non-participation                              | 13       | How many people refused to participate or dropped out? Reasons?                                                                                          | 8                    |
| <i>Setting</i>                                 |          |                                                                                                                                                          |                      |
| Setting of data collection                     | 14       | Where was the data collected? e.g. home, clinic, workplace                                                                                               | 7                    |
| Presence of non-participants                   | 15       | Was anyone else present besides the participants and researchers?                                                                                        | 7                    |
| Description of sample                          | 16       | What are the important characteristics of the sample? e.g. demographic data, date                                                                        | table 2              |
| <i>Data collection</i>                         |          |                                                                                                                                                          |                      |
| Interview guide                                | 17       | Were questions, prompts, guides provided by the authors? Was it pilot tested?                                                                            | table 1              |
| Repeat interviews                              | 18       | Were repeat interviews carried out? If yes, how many?                                                                                                    | n/a                  |
| Audio/visual recording                         | 19       | Did the research use audio or visual recording to collect the data?                                                                                      | 8                    |
| Field notes                                    | 20       | Were field notes made during and/or after the interview or focus group?                                                                                  | n/a                  |
| Duration                                       | 21       | What was the duration of the interviews or focus group?                                                                                                  | 8                    |
| Data saturation                                | 22       | Was data saturation discussed?                                                                                                                           | 17                   |
| Transcripts returned                           | 23       | Were transcripts returned to participants for comment and/or                                                                                             | n/a                  |

| Topic                                  | Item No. | Guide Questions/Description                                                                                                        | Reported on Page No. |
|----------------------------------------|----------|------------------------------------------------------------------------------------------------------------------------------------|----------------------|
|                                        |          | correction?                                                                                                                        |                      |
| <b>Domain 3: analysis and findings</b> |          |                                                                                                                                    |                      |
| <i>Data analysis</i>                   |          |                                                                                                                                    |                      |
| Number of data coders                  | 24       | How many data coders coded the data?                                                                                               | 8-9                  |
| Description of the coding tree         | 25       | Did authors provide a description of the coding tree?                                                                              | Table 3              |
| Derivation of themes                   | 26       | Were themes identified in advance or derived from the data?                                                                        | 9                    |
| Software                               | 27       | What software, if applicable, was used to manage the data?                                                                         | n/a                  |
| Participant checking                   | 28       | Did participants provide feedback on the findings?                                                                                 | n/a                  |
| <i>Reporting</i>                       |          |                                                                                                                                    |                      |
| Quotations presented                   | 29       | Were participant quotations presented to illustrate the themes/findings?<br>Was each quotation identified? e.g. participant number | 9-15                 |
| Data and findings consistent           | 30       | Was there consistency between the data presented and the findings?                                                                 | 9-15                 |
| Clarity of major themes                | 31       | Were major themes clearly presented in the findings?                                                                               | 9-15                 |
| Clarity of minor themes                | 32       | Is there a description of diverse cases or discussion of minor themes?                                                             | 9-15                 |

Developed from: Tong A, Sainsbury P, Craig J. Consolidated criteria for reporting qualitative research (COREQ): a 32-item checklist for interviews and focus groups. *International Journal for Quality in Health Care*. 2007. Volume 19, Number 6: pp. 349 – 357

**Once you have completed this checklist, please save a copy and upload it as part of your submission. DO NOT include this checklist as part of the main manuscript document. It must be uploaded as a separate file.**

# BMJ Open

## Recommendations for successful sensory screening in older adults with dementia in long-term care: A qualitative environmental scan of Canadian specialists

|                                 |                                                                                                                                                                                                                                                                                                                                                                                                                          |
|---------------------------------|--------------------------------------------------------------------------------------------------------------------------------------------------------------------------------------------------------------------------------------------------------------------------------------------------------------------------------------------------------------------------------------------------------------------------|
| Journal:                        | <i>BMJ Open</i>                                                                                                                                                                                                                                                                                                                                                                                                          |
| Manuscript ID                   | bmjopen-2017-019451.R1                                                                                                                                                                                                                                                                                                                                                                                                   |
| Article Type:                   | Research                                                                                                                                                                                                                                                                                                                                                                                                                 |
| Date Submitted by the Author:   | 21-Nov-2017                                                                                                                                                                                                                                                                                                                                                                                                              |
| Complete List of Authors:       | Wittich, Walter; Universite de Montreal, School of Optometry; Centre de recherche interdisciplinaire en readaptation du Montreal metropolitain, MAB-Mackay & Institut Nazareth et Louis-Braille<br>Hobler, Fiona; Toronto Rehabilitation Institute, Research; University of Toronto, Speech-Language Pathology<br>Jarry, Jonathan; Universite de Montreal, School of Optometry<br>McGilton, Kathy; University of Toronto |
| <b>Primary Subject Heading</b>: | Nursing                                                                                                                                                                                                                                                                                                                                                                                                                  |
| Secondary Subject Heading:      | Qualitative research, Ophthalmology, Mental health, Geriatric medicine, Ear, nose and throat/otolaryngology                                                                                                                                                                                                                                                                                                              |
| Keywords:                       | Dementia < NEUROLOGY, vision impairment, hearing loss, Screening                                                                                                                                                                                                                                                                                                                                                         |
|                                 |                                                                                                                                                                                                                                                                                                                                                                                                                          |

SCHOLARONE™  
Manuscripts

Only



1  
2  
3 **Recommendations for successful sensory screening in older adults with dementia in long-**  
4  
5 **term care: A qualitative environmental scan of Canadian specialists**

6  
7 Walter Wittich<sup>1,2,3</sup>, Fiona Höbler<sup>4,5</sup>, Jonathan Jarry<sup>1,2</sup>, Kathy McGilton<sup>4,6</sup>,

- 8  
9  
10 1) School of Optometry, Univeristy of Montreal, Montreal, Quebec, Canada  
11  
12 2) CRIR/Centre de réadaptation MAB-Mackay du CIUSSS du Centre-Ouest-de-l'Île-de-  
13  
14 Montréal  
15  
16 3) CRIR/Institut Nazareth et Louis-Braille du CISSS de la Montérégie-Centre  
17  
18 4) Department of Research, Toronto Rehabilitation Institute-University Health Network,  
19  
20 Toronto, Ontario, Canada  
21  
22 5) Department of Speech-Language Pathology, University of Toronto, Toronto,  
23  
24 Ontario, Canada  
25  
26 6) Lawrence S. Bloomberg Faculty of Nursing, University of Toronto, Ontario,  
27  
28 Canada  
29  
30  
31  
32  
33  
34

35 Corresponding author:

36  
37 Walter Wittich, PhD FAAO CLVT

38 Assistant Professor, School of Optometry Université de Montréal

39  
40 3744, rue Jean-Brillant, 260-7

41  
42 Montréal, (Québec) H3T 1P1

43  
44 Tel. 514 343 7962; Fax. 514 343 2382

45  
46 [walter.wittich@umontreal.ca](mailto:walter.wittich@umontreal.ca)

47  
48  
49  
50  
51  
52  
53 Keywords: nursing, long-term care, sensory screening, hearing loss, vision loss

54  
55 Word count: 4910

## ABSTRACT

**Objectives** – This study aimed to identify screening tools, technologies, and strategies that vision- and hearing-care specialists recommend to front-line healthcare professionals for the screening of older adults in long-term care homes who have dementia.

**Setting:** An environmental scan of healthcare professionals took place via telephone interviews between December 2015 and March 2016. All interviews were audio-recorded, transcribed, proofed for accuracy, and their contents thematically analyzed by two members of the research team.

**Participants** – Eleven professionals from across Canada specializing in the fields of vision- and hearing healthcare and technology for older adults with cognitive impairment were included in the study.

**Outcome measures**– As part of a larger mixed-methods project, this qualitative study used semi-structured interviews and their subsequent content analysis.

**Results** - Following a two-step content analysis of interview data, coded citations were grouped into three main categories: 1) barriers, 2) facilitators, and 3) tools and strategies that do or do not work for sensory screening of older adults with dementia. We report on the information offered by participants within each of these themes, along with a summary of tools and strategies that work for screening older adults with dementia

**Conclusions** – Recommendations from sensory specialists to nurses working in long-term care included the need for improved inter-professional communication and collaboration, as well as flexibility, additional time, and strategic use of clinical intuition and ingenuity. These suggestions at times contradicted the realities of service provision or the need for standardized and validated measures.

### Strengths and Limitations of this Study

- This study provides a unique opportunity for inter-professional knowledge translation by drawing on the clinical experience of experts in vision- and hearing-healthcare who specialize in providing services to older adults with dementia, in order to let nurses working in long-term care benefit from their expertise when screening for sensory impairments.
- By taking advantage of a qualitative research approach, this study is able to provide a description of directly applicable tools and strategies for sensory screening with older adults whose ability to respond to standardized traditional screening techniques may be impaired due to their cognitive limitations.
- The results highlight the challenge of bridging the gap between the professional expectations of rigor and standardization in sensory assessment, and the realities of practice in a long-term care environment.
- Generalization of the findings is limited by the small sample size (n = 11), narrow recruitment region (Canada) and the focus on stakeholders in sensory care only.

## INTRODUCTION

As we age, our sensory capacities decline, which is reflected in the increased prevalence rates of hearing and visual loss in older adults. Hearing loss has been estimated to affect up to 50% of individuals 65 years of age and older [1], and vision impairment has been reported to affect 18% of those aged 70 years and over [2]. Together, vision and hearing loss, known as dual-sensory impairment (DSI), increases from a prevalence of less than 1% in persons younger than 70 years to 11.3% in adults aged 80 years or over, at which point over 80% of adults are affected by at least one sensory impairment [3]. Impaired sensory abilities are seen to be significantly more prevalent in older adults who are also experiencing cognitive decline. The most common type of dementia is Alzheimer's disease and is seen to increase dramatically in prevalence from 1.7-3% of adults aged over 65 years to 32% amongst those aged 85 years and older, and above 40% in those older than over 95 years of age [4,5]. Hearing loss has been found in over 90% of adults with cognitive impairment [6], and is highly correlated with the presence of cognitive problems [7], while visual impairment has been reported in more than 30% of individuals with dementia [8]. The neuro-degeneration that characterizes dementia likely has multifactorial causes [9] and involves and affects multiple cortical networks, including brain regions that support auditory and visual function [10–12]. Even though research on the underlying causal relationships between cognitive and sensory decline has not yet reached consensus [13,14], it is already clear that many factors related to aging and frailty are involved [15–17].

Hearing and vision impairments continue to be under-diagnosed and under-treated in this vulnerable population of older adults with cognitive impairment [8,18], even though adapted rehabilitation interventions for individuals with sensory loss have been presented [19] and

1  
2  
3 evidence exists for the improvement of cognitive functioning after sensory interventions [20,21].  
4  
5 The decline of older adults' cognitive and functional status and the severity of their disabilities  
6  
7 are reported risk factors for institutionalization into nursing and long-term care homes (LTCHs)  
8  
9 [22–24]. In fact, the prevalence of impaired sensory capacity is disproportionately higher in  
10  
11 people with dementia living in care homes [8] than amongst older adults living in the  
12  
13 community, with one third of residents in this setting having a single sensory impairment and an  
14  
15 additional third experiencing DSI [25]. Furthermore, over half of such cases have been shown to  
16  
17 be unreported [26], with under-diagnosis by the appropriate specialist due to lack of service  
18  
19 utilization [8] or those documented being untreated due to underutilization of rehabilitative  
20  
21 services by older adults [27,28].  
22  
23  
24  
25

26 The importance of appropriately identifying the sensory capacity in individuals with  
27  
28 dementia is not only underscored by their incommensurate prevalence rates and the need to  
29  
30 accurately determine the person's true cognitive status, but has been established as a healthcare  
31  
32 and research priority by those living with dementia themselves [29]. Furthermore, nurses and  
33  
34 other health care professionals responsible for the care of older adults with dementia have  
35  
36 reported the difficulty of differentiating between sensory and cognitive impairment in affected  
37  
38 residents [30]. Höbler et al. and others have also requested the provision of more specific  
39  
40 education on the appropriate methods of evaluating sensory impairment amongst residents  
41  
42 [31,32]. Prioritization of identifying the sensory capacity of older adults is further supported by  
43  
44 evidence of accelerated cognitive decline [33,34] and increased risk of incident dementia in those  
45  
46 with sensory impairment [35–37], as hearing impairment in particular can impact on all domains  
47  
48 of cognition [13]. Moreover, residents with impairment of both vision and hearing demonstrate  
49  
50 significantly higher incidence of new behavioral symptoms [25], and accelerated cognitive  
51  
52  
53  
54  
55  
56  
57  
58  
59  
60

1  
2  
3 decline due to lack of social engagement [38], which is, in turn, significantly associated with  
4 untreated sensory loss [39–41]. A recent study has also shown that cognitive impairment is most  
5 common in long-term care residents with DSI and that these individuals are at increased risk of  
6 mortality [42].  
7  
8  
9  
10

11  
12 The process of screening, assessment and evaluation of sensory and cognitive impairment  
13 in older adults has been researched in a variety of ways. Some researchers have examined how to  
14 evaluate cognition in persons who have either a hearing or a vision loss, both of which can  
15 interfere with the administration of cognitive testing procedures [43]. For example, Bertone and  
16 colleagues [44] magnified sub-tests of the Wechsler Adult Intelligence Scale [45] in order to  
17 make them accessible and visible for persons with central vision loss due to age-related macular  
18 degeneration. Wittich et al. [46] provided validation data for the Montreal Cognitive Assessment  
19 (MoCA) [47] in its blind version, which can be administered verbally only. Similarly, Lin et al.  
20 [48] developed a procedure to administer the MoCA to individuals with severe hearing  
21 impairment by making the test instructions available as a PowerPoint presentation, thereby  
22 avoiding problems of audibility. Other researchers have focused on the reverse of this approach,  
23 whereby they examined how vision or hearing testing can be adapted to individuals with  
24 cognitive decline [49,50]. Traditional testing procedures often require a response from the person  
25 tested as to whether the stimuli are seen or heard. However, in the presence of cognitive  
26 impairment, such “true” responses are potentially impacted by a variety of factors, including  
27 attention, comprehension, recall, focus, impairment severity, only to mention a few, and may  
28 need to be extrapolated in a different way. Therefore, the focus of the present study is on this  
29 adapted approach to sensory testing, and how nurses working in long-term care homes may be  
30 able to facilitate screening for sensory loss.  
31  
32  
33  
34  
35  
36  
37  
38  
39  
40  
41  
42  
43  
44  
45  
46  
47  
48  
49  
50  
51  
52  
53  
54  
55  
56  
57  
58  
59  
60

## Objectives

To address the urgent need of appropriate evaluation and treatment of sensory impairment in adults already experiencing cognitive decline, we conducted an environmental scan with professionals working in the field of health technology, optometry, ophthalmology, audiology, and dual sensory impairment, which was part of a larger mixed-methods project investigating suitable vision and hearing screening measures for older adults with dementia that could be used by nurses working in long-term care [51]. The main purpose of this environmental scan was to identify screening tools, old and new technologies, and assessment strategies that sensory healthcare specialists find suitable for screening older adults who have dementia, and was carried out complementary to an environmental scan with nurses who work with residents who have dementia in LTCHs) [32].

## METHODS

Following the completion of a review of the literature on hearing and vision screening tools as per our protocol [51], this second step of the investigation was carried out in order to identify what tools, technologies and strategies are currently being used by vision and hearing professionals when serving older adults with cognitive impairment. To accomplish this, we employed an environmental scan. In healthcare research, the environmental scan is often employed as a needs-assessment tool for the purposes of improving and developing the efficiency of health service programs and evidence-based policies [52,53]. In using this approach, environmental or contextual factors are evaluated by reviewing existing data or actively collecting new data in the form of surveys or interviews, including a diversity of views and information, to determine the benefits, needs and efficiencies of practices within that environment [52]. As in the literature review, a broad definition of measures and technologies

1  
2  
3 was adopted, to include paper-based tests, software solutions such as apps and extensions for  
4 mobile devices, and higher-tech devices such as portable ophthalmic or audiometric equipment,  
5  
6 as well as informal assessment strategies used with residents who had dementia or limited  
7  
8 cognitive or communication abilities.  
9  
10

11  
12 The scan was conducted by a clinically trained member of the research team (FH, MSc,  
13 female), who interviewed participating professionals about: their thoughts and experiences of  
14 using tools, technologies, and strategies to screen for vision or hearing impairment in persons  
15 who have dementia, the tools and strategies they have found to be most useful, the ways in which  
16 current measures could be improved, and what they consider to be key elements for inclusion in  
17 a sensory screening package (see Table 1). This research was completed with the approval of the  
18 Research Ethics Boards of the University Health Network, Toronto, Canada, and in accordance  
19 with The Code of Ethics of the World Medical Association (Declaration of Helsinki) for  
20 experiments involving humans [54]. All participants provided informed written consent before  
21 enrolling in the study.  
22  
23  
24  
25  
26  
27  
28  
29  
30  
31  
32  
33  
34  
35  
36  
37

## 38 **PARTICIPANTS**

39  
40 A convenience sample of eleven professionals from across Canada with expertise in  
41 vision, hearing, dual sensory impairment or healthcare technologies were recruited through their  
42 connections with members of the larger study team or through referral by participants already  
43 enrolled in or contacted about the study. Based on previous research with similar methodological  
44 approaches [55,56], the sample size was seen as sufficient for the data collection purposes of the  
45 present study. The research coordinator (FH) made initial contact with potential candidates by  
46 email or by phone. Eleven participants agreed to take part in this study, while one candidate  
47  
48  
49  
50  
51  
52  
53  
54  
55  
56  
57  
58  
59  
60



1  
2  
3 declined due to a perceived lack of expertise in the area, and another due to time constraints  
4  
5 during the data collection period. Participant characteristics of all interviewees included in this  
6  
7 study are summarized in Table 2.  
8  
9

## 10 11 12 **DATA COLLECTION** 13

14  
15 By use of a semi-structured guide, the environmental scan interviews took place via  
16  
17 telephone between December 2015 and March 2016. After receiving background information on  
18  
19 the study, its purpose, as well as answers to any questions they had, written informed consent  
20  
21 was received from all participants at the time of or prior to data collection via email or fax. The  
22  
23 interview protocol was applied in relevance to the participants' area of expertise (i.e., vision,  
24  
25 hearing or dual sensory loss), and participants were encouraged to offer any additional  
26  
27 information they felt was applicable to the study's objectives and/or that had not been covered by  
28  
29 the semi-structured interview script [57]. Two participants were interviewed together upon  
30  
31 request, resulting in a total of 10 interviews with 11 participants being conducted. There was no  
32  
33 time limit applied to the interviews, with these having a mean duration of 40 min 30.66 s [SD =  
34  
35 11.83 min, range 19 to 54 min.].  
36  
37  
38  
39  
40  
41  
42

## 43 **DATA ANALYSIS** 44

45 All interviews were audio-recorded, transcribed by a third party, and proofed for  
46  
47 accuracy by a member of the research team [FH]. Following full anonymization of the data sets,  
48  
49 the transcribed contents of the interviews underwent thematic analysis [58]. Two members of the  
50  
51 research team (WW, PhD; JJ, MSc) analyzed all sets to identify data relating to the following:  
52  
53 tools/strategies that work for screening (vision/hearing), tools/strategies that do not work for  
54  
55  
56  
57  
58  
59

1  
2  
3 screening, and tools/strategies that may work. This data analysis followed a coding protocol in  
4 which data was first coded as a Tool or Strategy, and secondly whether it was reported to work  
5 or not, then as to whether it applied to vision or hearing screening. For example, “T+H”, which  
6 denoted a measured that was reported to work well for hearing screening, or “S?V”, which  
7 denoted a strategy that may work for vision. Additional codes related to information reported as:  
8 a “golden quote”, a sentence or paragraph that is striking or characteristic, the name of a tool  
9 when first mentioned (e.g., Snellen chart), a barrier to sensory screening, a recommendation on  
10 what should be done according to the participant, other content of interest, as well as any “red  
11 flag” or risk factor or other trigger for screening (e.g. diabetes, missing hearing aid, missing  
12 glasses). During a second level of thematic analysis, the extracted data from the first level were  
13 again analyzed for the identification of prominent themes in the interviews with participants.  
14 Agreement was achieved through the concurrent coding and discussion involving both analysts  
15 (WW, JJ), and differences in opinion when interpreting content were resolved face to face [59],  
16 an approach that members of the team have previously utilized successfully [60–63]. These  
17 themes are reported below.

## 37 FINDINGS

38  
39  
40 Following a two-step content analysis of interview data, coded citations were grouped  
41 into three main themes: 1) *barriers*, 2) *facilitators*, and 3) *tools and strategies that related to the*  
42 *screening of older adults with dementia*. Here we report on the information offered by  
43 participants within each of these themes. In addition, we present a summary of tools and  
44 strategies that work for screening older adults with dementia (see Table 3). Direct participants’  
45 quotes are presented in italics below, whereby each quote is identified by the source code.

### 54 Facilitators

1  
2  
3 Our interviewees identified few *facilitators*, as they were more likely to share barriers to  
4 their work. The main enablers of sensory screening in residents with dementia were indeed other  
5 people. The clients themselves can become facilitators and advocates, as can family members,  
6 activation workers, as well as long-term care facility staff.  
7  
8  
9  
10

11  
12 An audiologist pointed out that hearing screening clinics in long-term care facilities can  
13 be organized by a facility employee:  
14

15  
16 *I'm thinking we could get called in to do a screening, we could have an activation worker*  
17 *in a long-term care facility say, "I would like to have a hearing screening clinic." [participant*  
18 *4]*  
19  
20  
21  
22

23  
24 Local support by staff and residents can help bring awareness of hearing loss to others:  
25

26 *It's not always possible for me, as an audiologist, to be everywhere and see everyone, so*  
27 *to have staff members also be advocates for hearing is very important and, you know, to have*  
28 *residents themselves be advocates for hearing. [participant 5]*  
29  
30  
31  
32

33 The nurses, whose lack of availability was often branded as a barrier, were once  
34 mentioned in a more positive context:  
35

36  
37 *The nurse manager on that unit was very receptive to having some audiological*  
38 *intervention on her unit, and so we actually designed a simple screening program there,*  
39 *because she wanted the nurses to be able to do the screening [...]. And she felt that it was*  
40 *important to get the nurses on her unit involved in that screening. [participant 2]*  
41  
42  
43  
44  
45  
46  
47  
48

## 49 **Barriers**

50  
51 In the interviews with vision and hearing specialists on the subject of sensory screening in  
52 residents with a cognitive impairment, the two barriers to screening that were most often  
53  
54  
55  
56  
57  
58  
59  
60

1  
2  
3 repeated were *impaired communication* and *lack of staff involvement* . Impaired communication  
4  
5 can mean not knowing if a client's answer is reliable; not being able to use traditional means of  
6  
7 communication; or not being able to communicate at all when the neurological condition is too  
8  
9 advanced. One interviewee explained:

10  
11  
12 *And when we are at the long-term care facility, [...] some of [our residents] are*  
13  
14 *completely unresponsive, which of course is a challenge and, other times, it's just they*  
15  
16 *require more encouragement, constant repetition to remind them of the task that we're*  
17  
18 *doing, that kind of thing. [participant 7]*

19  
20  
21 Since many screening tests rely on self-report, impaired communication can jeopardize  
22  
23 subjective assessments:

24  
25  
26 *In the more advanced stages of dementia, it's very difficult to get a pure-tone audiogram,*  
27  
28 *because pure-tones become meaningless, so you have to use more meaningful stimuli.*  
29  
30  
31 *[participant 2]*

32  
33 Many sensory experts flagged the lack of staff involvement in the screening of persons  
34  
35 for hearing and vision loss. Some reported that educating the staff on the need to screen for  
36  
37 sensory loss was not helpful, as it is not a mandatory training activity for nurses. Participants  
38  
39 speculated that this absence may, in part, be due to policies or regulations that do not include or  
40  
41 promote sensory screening, lack of education and training on how to screen, or not prioritizing  
42  
43 hearing and vision screening given the multiple demands on their time. Moreover, screening by  
44  
45 staff is not always systematic:

46  
47  
48  
49 *We did find that the nurses, number one, only bothered to do [...] their screening on 50%*  
50  
51 *of the intake of the people that were admitted. And furthermore, failed to identify 40% of*  
52  
53 *the people that the student identified with the more extensive screening. [participant 2]*  
54  
55  
56  
57  
58  
59

1  
2  
3 Additional barriers that were less frequently mentioned were: hearing loss denial; lack of  
4 cooperation by the client's family; discomfort vis-à-vis the physical closeness often required for  
5 sensory screening; environmental noises during hearing screening; the presence of a combined  
6 hearing and vision loss; and the limitations of portable equipment often necessary for these on-  
7 location screenings.  
8  
9  
10  
11  
12  
13

### 14 **Strategies and Tools**

15  
16 Given the specific characteristics of people with a cognitive impairment, our specialists  
17 frequently suggested *strategies* to conduct sensory screening. We defined these as adaptations or  
18 behavioural accommodations in order to administer a particular screening tool, such as choosing  
19 a specific location or speed of administration. While certain strategies were unique to either  
20 vision or hearing screening, many such adaptations were mentioned by both groups of experts.  
21 By far the most common strategy was to *improve communication*. Many specialists highlighted  
22 the importance of establishing a friendly rapport with the client before screening, of reassuring  
23 and encouraging them throughout the procedure. Sometimes, repetition was key:  
24  
25  
26  
27  
28  
29  
30  
31  
32  
33  
34

35 *They require more encouragement, constant repetition to remind them of the task that*  
36 *we're doing. [participant 7]*  
37  
38

39  
40 Often, according to our interviewees, the client may not provide the type of feedback  
41 traditionally required by the subjective screen, emphasizing the value of flexibility. The response  
42 to "Can you see this?" or "Can you hear this?" can be a smile, a number of raised fingers, or a  
43 movement of the eye:  
44  
45  
46  
47  
48

49 *I remember one woman that was singing constantly, but she would stop singing when she*  
50 *could hear me, so that was one way of finding information. [participant 2]*  
51  
52  
53

54 It may also mean playing along with a resident's own understanding of the situation:  
55  
56  
57  
58  
59  
60

1  
2  
3 *One man believed he was being assessed to join the Greek military and so he was reading*  
4 *all of the letters on the Snellen chart in Greek. And I don't speak Greek and so we also*  
5 *bring a number chart with us. So, he was reading those out in Greek but at least there*  
6 *were only nine numbers for me memorize. So, I just started accepting Greek readings of*  
7 *the numbers instead and kind of learning Greek numeric system as we went. [participant*  
8 *10]*

9  
10  
11  
12  
13  
14  
15  
16  
17 The *preference for familiarity* was a recurring strategy mentioned by both hearing and  
18 vision specialists, such as choosing a familiar room and having a person the client trusts sitting  
19 by their side during the screening. Considerations of *time* were brought up as well: examples  
20 included screening on the right day, with breaks during the procedure, and the possibility of  
21 resting or finishing another day:

22  
23  
24  
25  
26  
27  
28 *Sometimes the assessment needs to be done over several appointments [participant 5].*

29  
30  
31 Finally, information can be gathered indirectly through *staff, family, and behaviour*. The  
32 latter, we were told, can serve as a clue to impairment:

33  
34  
35 *One of the most helpful things is having family there to at least give us a little bit of*  
36 *background about the resident, about things that they may have liked to have done when*  
37 *they were not at the long-term care facility such as reading or knitting, activities that they*  
38 *haven't been doing lately which could be because of their vision problems, either glasses*  
39 *or having some sort of eye condition that needs to be treated. [participant 3]*

40  
41  
42  
43  
44  
45  
46  
47 A small number of strategies were mentioned exclusively by vision specialists, while a  
48 much longer list could be drawn from the input of the hearing experts (see Table 3). Since  
49 hearing screening often relies on the playback of tones through headphones, it is interesting to  
50  
51  
52  
53  
54  
55  
56  
57  
58  
59  
60

1  
2  
3 note that interviewees disagreed amongst themselves as to whether or not ear buds were  
4  
5 preferable to headsets for this population. Some clients may prefer the former:  
6

7  
8 *If you come at somebody with a headset, often that's a bit alarming and they immediately*  
9  
10 *don't want to cooperate; but I've found that they're more compliant with insert phones.*

11  
12 *[participant 2]*

13  
14 while others are more at ease with the latter:

15  
16  
17 *I haven't had issues with people putting on headsets. [...] I'm not sold on removing the*  
18  
19 *idea of a headset."* *[participant 4]*  
20

21  
22 The above-mentioned strategies highlight that no one method of screening works for  
23  
24 everyone as some residents preferred headsets while others preferred phones. For both vision and  
25  
26 hearing, experts spoke of numerous tools they considered either to work, to not work, or to  
27  
28 possibly work with this population (see Table 3). On the hearing side, speech testing was often  
29  
30 mentioned as providing more meaningful stimuli to a client with a cognitive impairment than a  
31  
32 pure-tone audiogram: indeed, the latter test ended up both being recommended and being  
33  
34 rejected depending on the interviewee. Meanwhile, for either sense, very few of our participants  
35  
36 qualified themselves as knowledgeable on the topic of screening apps, such as Peek™ for vision  
37  
38 testing. They often knew of these portable technologies but had rarely used them. These apps  
39  
40 elicited the following concerns: that they were not designed or validated for use in a context of  
41  
42 dementia; that they relied on batteries that need to be recharged; and that the hardware (i.e. cell  
43  
44 phone or tablet screen and camera) is not professional grade. Still, many interviewees wanted to  
45  
46 see data on how they compared to traditional screening methods and were even willing to try  
47  
48 them out for themselves.  
49  
50  
51  
52  
53  
54  
55  
56  
57  
58  
59  
60

1  
2  
3 A recurring comment on the part of audiologists spanned multiple coding categories,  
4 acting as a barrier, forming a recommendation, and being suggested as a screening tool that  
5 works for hearing: the *presence of wax* and its removal through otoscopy. As one hearing expert  
6  
7  
8  
9  
10 put it:

11  
12 *I think all screening should be accompanied by otoscopic examination, because one other*  
13  
14 *thing I've learned is that many seniors, especially those in the nursing homes, they don't*  
15  
16 *tend to get kind of routine ear exams, tend to have accumulations of wax that would*  
17  
18 *definitely be possibly interfering with their hearing. So having that wax removed before*  
19  
20 *you do any testing, is really important. [...] Anybody who's getting involved with*  
21  
22 *screening of seniors' hearing needs to have some training in cerumen management,*  
23  
24 *certainly. [participant 2]*  
25  
26  
27  
28  
29

## 30 **DISCUSSION**

31  
32  
33 The purpose of the present study was to explore the advice of specialists in the field of  
34 sensory health care for older adults with dementia, in order to develop recommendations for  
35 nurses working in long-term care facilities to be able to better screen their residents for the  
36 presence of vision and/or hearing loss. The participants reported on several facilitators and  
37 barriers, and how these can each be strengthened and overcome through adaptive strategies.  
38  
39 Ideally, a screening protocol would be able to examine vision and hearing function  
40 simultaneously or during the same testing opportunity, because time is often sparse and the  
41 pressures on health care providers are many. However, one central theme, common among the  
42 suggested approaches, was to allow and encourage clients (and clinicians) to take their time  
43  
44  
45  
46  
47  
48  
49  
50  
51  
52  
53  
54 when engaging in the testing of sensory functioning, as subtle information and behavioural cues  
55  
56  
57  
58  
59  
60



1  
2  
3 often become the true source of information in sensory screening, and may then be lost if  
4  
5 rigorously standardized (and fast) protocols are adhered to.  
6

7  
8 In this particular population, sensory screening methods need to be flexible enough to  
9  
10 accommodate a range of cognitive resources, whereby individuals with mild cognitive  
11  
12 impairments may well be able to complete normal testing procedures if given the chance and the  
13  
14 time. Those with moderate to severe cognitive impairment, however, may require adjustments in  
15  
16 the administration of screening measures and strategies, led by use of clinical judgment and  
17  
18 intuition. Such approaches can easily be supplemented with the use of questionnaires (or a  
19  
20 subsection of questions therein), as well as more objective measures in order to ensure reliability  
21  
22 of test results. Ideally, the stimuli that are used are meaningful to the resident (e.g., their name)  
23  
24 and are speech-based because of their ecological importance over pure tones. When simplicity  
25  
26 was important, the use of numbers (both for speech as well as vision testing) was recommended.  
27  
28 In addition, the use of pictograms or picture-matching was a proposed possibility to elicit  
29  
30 responses. In addition, making sure the methods of screening aligned with the residents  
31  
32 preferences (phones or headsets) is essential for a quality screening result. Finally, our  
33  
34 respondents expressed openness to using and exploring the potential of new technologies, such  
35  
36 as apps and devices, for screening purposes. However, their own experience with current  
37  
38 technologies was limited and they expressed concerns about their validity and availability, thus,  
39  
40 recommending that technologies require further development in order to serve this population.  
41  
42 A strength of the present study is its range of professionals and their level of expertise in  
43  
44 providing services to older adults with sensory and cognitive impairments; despite their number  
45  
46 being relatively small, data saturation was reached when assessed. In addition, this study tackles  
47  
48 cross-disciplinary communication barriers by bringing specialist recommendations to the  
49  
50  
51  
52  
53  
54  
55  
56  
57  
58  
59  
60

1  
2  
3 attention of nurses. We were able to replicate previous reports on the barriers and challenges that  
4 are encountered when providing sensory care to older adults in LTCHs, including difficulties in  
5 client's willingness to participate in the assessment (at times expressed as aggression or anxiety)  
6 as well as communication difficulties linked to cognitive losses, resulting in confusion (both at  
7 the part of the client and the clinician) [31]. Communication recommendations were in line with  
8 previous suggestions to adjust speech volume, speed, and body positioning face-to-face [30]. In  
9 addition, the present data are in agreement with previous reports about the necessity for  
10 flexibility in the testing procedure, such as the need to determine the optimal time of day for each  
11 individual to be tested, the option to pause and continue testing as needed, along with taking care  
12 to avoid fatigue or frustration on the part of the client [49].  
13  
14  
15  
16  
17  
18  
19  
20  
21  
22  
23  
24  
25

26 Our study needs to be viewed within certain limitations; for example, the logistics of data  
27 collection and imposed time and funding restrictions limited the recruitment scope, thereby only  
28 including participants within Canada, and those that were known within the professional network  
29 of the study team. This recruitment approach might have excluded practice perspectives more  
30 representative of other countries or service delivery systems. The scope of the study is further  
31 limited by the choice to focus on sensory health professionals, without including additional  
32 stakeholders. A parallel study is currently exploring the opinions of nurses working in LTCHs;  
33 however, including caregivers or primary care providers would provide further insights. The  
34 data-driven analysis approach revealed that the majority of strategies and tools mentioned were  
35 in the hearing domain, which is intuitively more closely linked to communication. Future studies  
36 may need to probe further into the use and usability of vision testing devices and strategies. They  
37 should provide additional background data on the participants that will allow for a better  
38 contextualization of the findings. For example, the frequency and intensity of service delivery by  
39  
40  
41  
42  
43  
44  
45  
46  
47  
48  
49  
50  
51  
52  
53  
54  
55  
56  
57  
58  
59  
60

1  
2  
3 the participating stakeholders would provide information about the level of expertise and  
4  
5 experience in service delivery and strategy development. In addition, this limitation may also  
6  
7 have had an effect on data saturation.  
8  
9

10 A remaining challenge is to reconcile the realities of nurses workloads in LTCHs with the  
11  
12 recommendations that have emerged from our specialist interviews. Specifically, the  
13  
14 recommendations of our vision and hearing care professionals are likely to go beyond the  
15  
16 resources available. Even though both groups agree that increased priority should be placed on  
17  
18 the sensory assessment of residents in order to improve communication [41], the reality of  
19  
20 service provision in LTCHs rarely allows for this level of individualized attention [64]. For  
21  
22 nurses working in LTCHs, the impact of regulations on nurse role flexibility and professional judgment  
23  
24 and an underfunded system contributing to insufficient resources and staffing [56] which influences their  
25  
26 ability to find time and resources to screen effectively. In addition, the technologies, tools and  
27  
28 abilities available versus the devices, techniques and skills that were recommended may not  
29  
30 match. For example, LTCH nurses may not have access to the necessary tools and training to  
31  
32 remove earwax, a potentially necessary step before hearing can truly be evaluated. Similarly,  
33  
34 pocket-sized eye charts may be necessary for vision screening, but may not necessarily be  
35  
36 available to all staff at any time, or staff may lack training to properly administer and interpret  
37  
38 the results when presenting the test at a specific distance or under non-optimal lighting  
39  
40 conditions. Previous research has provided educational content on vision- and hearing screening,  
41  
42 specifically with LTCH in mind [65–67]; however, knowledge transfer and implementation  
43  
44 appear to still be lacking. Meanwhile, some of the tests that may be known and available to  
45  
46 nurses may not hold up to the demands of rigor for sensory testing by the specialists. For  
47  
48 example, the use of measures such as the Whisper test and Finger Rub test that are evidenced as  
49  
50  
51  
52  
53  
54  
55  
56  
57  
58  
59  
60

1  
2  
3 suitable tests in the literature [68] did not find the approval of the specialists in our study, given  
4  
5 problems with standardization and validation.  
6

7  
8 The next steps in the development of a sensory screening tool for older adults with  
9  
10 dementia will include the integration of nurses' recommendations [32] with recommendations  
11  
12 from the experts who were interviewed for this environmental scan, as well as the results of a  
13  
14 systematic review of the literature on this topic. The members of this research team will then  
15  
16 develop and pilot test a screening tool for nurses to use in the LTCH to examine its feasibility,  
17  
18 reliability and validity. The present data indicate that strategies and training in easy-to-use  
19  
20 methods, as well as careful client observation, may play a prominent role in such a screening  
21  
22 tool. It is also possible that these methods and adaptive strategies may take shape in a new  
23  
24 technological application, which can be incorporated into portable devices such as cellphones or  
25  
26 a tablet computer - both technologies that are becoming more available in the clinical  
27  
28 environment [69,70]. Mandated training on the use of such a screening tool and continuous  
29  
30 efforts in knowledge translation would ensure its success, especially given its potential for far-  
31  
32 reaching benefits to clients and clinicians alike in their care provision and interaction in LTCHs.  
33  
34  
35  
36  
37  
38  
39  
40  
41  
42  
43  
44  
45  
46  
47  
48  
49  
50  
51  
52  
53  
54  
55  
56  
57  
58  
59  
60

1  
2  
3 **Contributors:** KSMcG is responsible for project conception and along with FH and WW for  
4 writing the protocol. FH, KSMcG and WW obtained ethics approval. FH collected the data. WW  
5 and JJ conducted the data analysis. WW, FH, JJ and KSMcG were involved in data  
6 interpretation, writing, editing and revising the manuscript.  
7  
8  
9  
10  
11  
12  
13

14 **Competing interests:** none declared  
15  
16  
17  
18

19 **Funding:** This work was supported by the Alzheimer Society Research Programme (ASRP),  
20 Alzheimer Society of Canada; grant number RG 16-08. WW is supported by an FRQ-S Junior 1  
21 career award (# 28881 & 30620).  
22  
23  
24  
25  
26  
27

28 **Data sharing statement:** Access to the raw qualitative data is available upon request, given  
29 appropriate ethics approval.  
30  
31  
32  
33  
34  
35  
36  
37  
38  
39  
40  
41  
42  
43  
44  
45  
46  
47  
48  
49  
50  
51  
52  
53  
54  
55  
56  
57  
58  
59  
60

1  
2  
3 **Table 1: Interview Questions**  
4  
5

- 6
- 7 • Do you administer hearing and vision screening tests to residents at this facility?
  - 8 • How long have you been working with persons who have dementia?
  - 9 • Please describe your experience of working with persons who have dementia, as well as persons  
10 with hearing and vision loss.
  - 11 • How do you differentiate between residents who have difficulty understanding due to a hearing  
12 impairment and those with cognitive impairments?
  - 13 • How are residents identified as being in need of assessment for vision and hearing impairment?  
14 – Is there a standard procedure in place, and, if so, what are the steps?  
15 – What is the procedure for referring residents to a hearing and/or vision specialist?
  - 16 • What tools, technologies, and strategies are you currently using to assess and/or detect vision  
17 and/or hearing in persons who have dementia?
  - 18 • What approach is used or do you use in assessing persons who have dementia e.g. what  
19 combination of tools, technologies, and strategies is being implemented?
  - 20 • How do these tools, technologies, and strategies identify a person as having hearing and/or  
21 vision impairments?
  - 22 • What are the facilitators and barriers in implementing this approach and/or procedure?  
23 – Please list all the challenges in using these tools, technologies, and strategies.  
24 – Please also list all the benefits to using these tools, technologies, and strategies.
  - 25 • In what way can these tools, technologies, and strategies be improved?
  - 26 • In your opinion, what are the key elements to include in a hearing and vision screening package  
27 for persons who have dementia?
  - 28 • Do you have knowledge of or experience in using either of the following:  
29 – **Peek** application (turns a smartphone into an eye exam tool)?  
30 ...or similar other apps?  
31 – **uHear** application (downloadable audiometer on to an iPod Touch as a test for hearing  
32 loss)?  
33 ...or similar other apps?  
34  
35  
36  
37  
38  
39  
40  
41  
42  
43  
44  
45  
46  
47  
48  
49  
50  
51  
52  
53  
54  
55  
56  
57  
58  
59  
60

**Table 2: Summary of Participant Characteristics (N=11)**

| <b>Categorical Characteristics</b> | <b>N</b> | <b>[%]</b> |
|------------------------------------|----------|------------|
| Audiologist                        | 2        | 18         |
| Optometrist                        | 4        | 36         |
| Speech-Language Pathologist        | 1        | 9          |
| Dual-sensory specialist            | 2        | 18         |
| Hearing counsellor                 | 1        | 9          |
| Health technology specialist       | 1        | 9          |
| Female                             | 10       | 91         |

---

| <b>Continuous Characteristics</b>                |       |             |
|--------------------------------------------------|-------|-------------|
| Years' experience working in dementia care (N=8) | 14.56 | [SD= 12.03] |

Table 3. Tools and Strategies for vision and hearing screening with older adults affected by dementia, as recommended by sensory specialists.

|            | HEARING SCREENING                                                                                                                                                                                                                                                                                                                                                                                                                                                                                                                                                                                                                                                                                                                                                                                                                                                                                                                                                                                                                                                                                                                                                                                                                                                              | VISION SCREENING                                                                                                                                                                                                                                                                                                                                                                                                                                                                          |
|------------|--------------------------------------------------------------------------------------------------------------------------------------------------------------------------------------------------------------------------------------------------------------------------------------------------------------------------------------------------------------------------------------------------------------------------------------------------------------------------------------------------------------------------------------------------------------------------------------------------------------------------------------------------------------------------------------------------------------------------------------------------------------------------------------------------------------------------------------------------------------------------------------------------------------------------------------------------------------------------------------------------------------------------------------------------------------------------------------------------------------------------------------------------------------------------------------------------------------------------------------------------------------------------------|-------------------------------------------------------------------------------------------------------------------------------------------------------------------------------------------------------------------------------------------------------------------------------------------------------------------------------------------------------------------------------------------------------------------------------------------------------------------------------------------|
| TOOLS      | <ul style="list-style-type: none"> <li>▪ "Hear Mans" (manikin head with headphones on used for a quick hearing test)</li> <li>▪ Asking simple questions (does the patient wear hearing aids? does the patient have them?)</li> <li>▪ Chart review</li> <li>▪ Five-minute hearing test</li> <li>▪ Hearing Dependent Daily Activities questionnaire</li> <li>▪ Otoacoustic emissions</li> <li>▪ Picture board</li> <li>▪ Pocket Talker (how the person responds to using it)</li> <li>▪ Pure-tone audiology</li> <li>▪ Questionnaire devised by a former student of the interviewee's</li> <li>▪ Repeating numbers</li> <li>▪ Speech testing</li> <li>▪ Whisper test and finger rub</li> </ul>                                                                                                                                                                                                                                                                                                                                                                                                                                                                                                                                                                                   | <ul style="list-style-type: none"> <li>▪ Auto-refractor</li> <li>▪ Case history</li> <li>▪ Finger counting</li> <li>▪ Health questionnaire</li> <li>▪ Matching game</li> <li>▪ Objective measures (prescription assessment, eye exam)</li> <li>▪ Sentences on a board in different sized font</li> <li>▪ Vision questionnaire</li> <li>▪ Visual charts (letters, numbers, sentences, single words, pictures, tumbling Es)</li> </ul>                                                      |
| STRATEGIES | <ul style="list-style-type: none"> <li>▪ Ensure that cerumen (ear wax) has been removed</li> <li>▪ Alternating between testing the left and right ear until you get an answer if no initial response to pitch testing</li> <li>▪ Applying techniques developed for screening in children</li> <li>▪ Asking basic questions as a form of hearing screening</li> <li>▪ Bowing out of the screening gracefully if it could not be finished</li> <li>▪ Choosing more meaningful stimuli than pure tones</li> <li>▪ Choosing "pulsing beeps" instead of "single beeps" on the audiometer</li> <li>▪ Choosing a quiet room</li> <li>▪ Educating nurses and doctors on the importance of hearing and screening</li> <li>▪ Frequently encouraging the client</li> <li>▪ Gradually reducing the level of stimulus presentation to find their threshold</li> <li>▪ Repeating measurements to ensure reliability of client self-report</li> <li>▪ Rephrasing screening questions to avoid denial of the problem</li> <li>▪ Starting with speech testing</li> <li>▪ Taking breaks as needed</li> <li>▪ Using a headset instead of ear buds</li> <li>▪ Using ear buds instead of a headset</li> <li>▪ Using sound amplification (e.g. Pocket Talker) to facilitate communication</li> </ul> | <ul style="list-style-type: none"> <li>▪ Bringing the eye chart closer than normal</li> <li>▪ Distributing a vision form for caregiver to request exam or to help staff look at changes that would warrant a screening</li> <li>▪ Emphasizing that the purpose of the screening is to monitor the health of the individual</li> <li>▪ Respecting their autonomy during the screening</li> <li>▪ Staying away from the patient and moving around them with portable instruments</li> </ul> |

References:

- 1 Cruickshanks K, Wiley T, Tweed B, *et al.* The prevalence of hearing loss in older adults in Beaver Dam, Wisconsin: The epidemiology of hearing loss study. *Am J Epidemiol* 1998;**148**:879–85.<http://aje.oxfordjournals.org/content/148/9/879.full.pdf>
- 2 Crews JE, Campbell VA, John E, *et al.* Vision impairment and hearing loss among



- community-dwelling older Americans: implications for health and functioning. *Am J Public Health* 2004;**94**:823–9.
- 3 Swenor BK, Ramulu PY, Willis JR, *et al.* The Prevalence of Concurrent Hearing and Vision Impairment in the United States. *JAMA Intern Med* 2013;**173**:1–5. doi:10.1001/jamainternmed.2013.1880
- 4 Prince M, Knapp M, Guerchet M, *et al.* *Dementia UK: Update*. London, UK: 2014. [www.cfas.ac.uk/files/2015/07/P326\\_AS\\_Dementia\\_Report\\_WEB2.pdf](http://www.cfas.ac.uk/files/2015/07/P326_AS_Dementia_Report_WEB2.pdf)
- 5 Hebert LE, Weuve J, Scherr PA, *et al.* Alzheimer disease in the United States (2010–2050) estimated using the 2010 census. *Neurology* 2013;**80**:1778–83. doi:10.1212/WNL.0b013e31828726f5
- 6 Gold M, Lightfoot LA, Hnath-Chisolm T. Hearing loss in a memory disorders clinic. A specially vulnerable population. *Arch Neurol* 1996;**53**:922–8. <http://www.ncbi.nlm.nih.gov/pubmed/8815858> (accessed 24 Aug 2017).
- 7 Taljaard DS, Olaithe M, Brennan-Jones CG, *et al.* The relationship between hearing impairment and cognitive function: a meta-analysis in adults. *Res Gerontol Nurs* 2015;**41**:80–6. doi:10.3928/19404921-20080401-08
- 8 Bowen M, Edgar DF, Hancock B, *et al.* *The Prevalence of Visual Impairment in People with Dementia (the ProVIDE study): a cross-sectional study of people aged 60–89 years with dementia and qualitative exploration of individual, carer and professional perspectives*. NIHR Journals Library 2016. doi:10.3310/HSDR04210
- 9 Livingston G, Sommerlad A, Orgeta V, *et al.* Dementia prevention, intervention, and care. *Lancet* 2017;**6736**. doi:10.1016/S0140-6736(17)31363-6
- 10 Hardy CJD, Marshall CR, Golden HL, *et al.* Hearing and dementia. *J Neurol* 2016;**263**:2339–54. doi:10.1007/s00415-016-8208-y
- 11 Cronin-Golomb A, Corkin S, Growdon JH. Visual dysfunction predicts cognitive deficits in Alzheimer’s disease. *Optom Vis Sci* 1995;**72**:168–76. <http://www.ncbi.nlm.nih.gov/pubmed/7609939> (accessed 24 Aug 2017).
- 12 Mentis MJ, Horwitz B, Grady CL, *et al.* Visual cortical dysfunction in Alzheimer’s disease evaluated with a temporally graded ‘stress test’ during PET. *Am J Psychiatry* 1996;**153**:32–40. doi:10.1176/ajp.153.1.32
- 13 Taljaard DS, Olaithe M, Brennan-Jones CG, *et al.* The relationship between hearing impairment and cognitive function: a meta-analysis in adults. *Clin Otolaryngol* 2016;**41**:718–29. doi:10.1111/coa.12607
- 14 Wayne R V, Johnsrude IS. A review of causal mechanisms underlying the link between age-related hearing loss and cognitive decline. *Ageing Res Rev* 2015;**23**:154–66. doi:10.1016/j.arr.2015.06.002
- 15 Panza F, Solfrizzi V, Seripa D, *et al.* Age-related hearing impairment and frailty in Alzheimer’s disease: interconnected associations and mechanisms. *Front Aging Neurosci* 2015;**7**. doi:10.3389/fnagi.2015.00113
- 16 Logroscino G, Panza F. The Role of Hearing Impairment in Cognitive Decline: Need for the Special Sense Assessment in Evaluating Cognition In Older Age. *Neuroepidemiology* 2016;**46**:290–1. doi:10.1159/000445988
- 17 Panza F, Seripa D, Solfrizzi V, *et al.* Targeting Cognitive Frailty: Clinical and Neurobiological Roadmap for a Single Complex Phenotype. *J Alzheimer’s Dis* 2015;**47**:793–813. doi:10.3233/JAD-150358
- 18 Allen NH, Burns A, Newton V, *et al.* The effects of improving hearing in dementia. *Age*

- 1  
2  
3  
4  
5  
6  
7  
8  
9  
10  
11  
12  
13  
14  
15  
16  
17  
18  
19  
20  
21  
22  
23  
24  
25  
26  
27  
28  
29  
30  
31  
32  
33  
34  
35  
36  
37  
38  
39  
40  
41  
42  
43  
44  
45  
46  
47  
48  
49  
50  
51  
52  
53  
54  
55  
56  
57  
58  
59  
60
- Ageing* 2003;**32**:189–93.
- 19 Whitson HE, Whitaker D, Potter G, *et al.* A low-vision rehabilitation program for patients with mild cognitive deficits. *JAMA Ophthalmol* 2013;**131**:912–9. doi:10.1001/jamaophthalmol.2013.1700
- 20 Castiglione A, Benatti A, Velardita C, *et al.* Aging, Cognitive Decline and Hearing Loss: Effects of Auditory Rehabilitation and Training with Hearing Aids and Cochlear Implants on Cognitive Function and Depression among Older Adults. *Audiol Neurootol* 2016;**21 Suppl 1**:21–8. doi:10.1159/000448350
- 21 Mosnier I, Bebear J-P, Marx M, *et al.* Improvement of Cognitive Function After Cochlear Implantation in Elderly Patients. *JAMA Otolaryngol Neck Surg* 2015;**141**:1–9. doi:10.1001/jamaoto.2015.129
- 22 Hébert R, Dubois MF, Wolfson C, *et al.* Factors associated with long-term institutionalization of older people with dementia: data from the Canadian Study of Health and Aging. *J Gerontol A Biol Sci Med Sci* 2001;**56**:M693-9. <http://www.ncbi.nlm.nih.gov/pubmed/11682577> (accessed 25 Aug 2017).
- 23 Severson MA, Smith GE, Tangalos EG, *et al.* Patterns and predictors of institutionalization in community-based dementia patients. *J Am Geriatr Soc* 1994;**42**:181–5. <http://www.ncbi.nlm.nih.gov/pubmed/8126333> (accessed 25 Aug 2017).
- 24 Steele C, Rovner B, Chase GA, *et al.* Psychiatric symptoms and nursing home placement of patients with Alzheimer's disease. *Am J Psychiatry* 1990;**147**:1049–51. doi:10.1176/ajp.147.8.1049
- 25 Yamada Y, Vlachova M, Richter T, *et al.* Prevalence and Correlates of Hearing and Visual Impairments in European Nursing Homes: Results From the SHELTER Study. *J Am Med Dir Assoc* 2014;**15**:738–43. doi:10.1016/j.jamda.2014.05.012
- 26 Sinoo MM, Kort HSM, Duijnste MSH. Visual functioning in nursing home residents: information in client records. *J Clin Nurs* 2012;**21**:1913–21. doi:10.1111/j.1365-2702.2012.04128.x
- 27 Wattamwar K, Qian ZJ, Otter J, *et al.* Increases in the Rate of Age-Related Hearing Loss in the Older Old. *JAMA Otolaryngol Neck Surg* 2017;**143**:41. doi:10.1001/jamaoto.2016.2661
- 28 Overbury O, Wittich W. Barriers to low vision rehabilitation: the Montreal Barriers Study. *Investig Ophthalmol Vis Sci* 2011;**52**:8933–8. doi:10.1167/iovs.11-8116
- 29 The College of Optometrists. The Visual Impairment and Dementia Summit. 2016.
- 30 Slaughter SE, Hopper T, Ickert C, *et al.* Identification of hearing loss among residents with dementia: Perceptions of health care aides. *Geriatr Nurs (Minneap)* 2014;**35**:434–40. doi:10.1016/j.gerinurse.2014.07.001
- 31 Labreche T, Stolee P, McLeod J. An optometrist-led eye care program for older residents of retirement homes and long-term care facilities. *Can Geriatr J* 2011;**14**:8–11. <http://www.ncbi.nlm.nih.gov/pubmed/23251304> (accessed 25 Aug 2017).
- 32 Höbler F, Argueta-Warden X, Rodríguez Monforte M, *et al.* Exploring the sensory screening experiences of nurses working in long-term care homes with residents who have dementia: a qualitative study. *BMC Geriatr* 2017.
- 33 Humes LE, Busey TA, Craig J, *et al.* Are age-related changes in cognitive function driven by age-related changes in sensory processing? *Attention, Perception, Psychophys* 2013;**75**:508–24. doi:10.3758/s13414-012-0406-9
- 34 Lin F, Yaffe K, Xia J, *et al.* Hearing Loss and Cognitive Decline in Older Adults. *JAMA*

- 1  
2  
3  
4  
5  
6  
7  
8  
9  
10  
11  
12  
13  
14  
15  
16  
17  
18  
19  
20  
21  
22  
23  
24  
25  
26  
27  
28  
29  
30  
31  
32  
33  
34  
35  
36  
37  
38  
39  
40  
41  
42  
43  
44  
45  
46  
47  
48  
49  
50  
51  
52  
53  
54  
55  
56  
57  
58  
59  
60
- Intern Med* 2013;**173**:293. doi:10.1001/jamainternmed.2013.1868
- 35 Lin F, Albert M. Hearing loss and dementia – who is listening? *Aging Ment Health* 2014;**18**:671–3. doi:10.1080/13607863.2014.915924
- 36 Gallacher J, Ilubaera V, Ben-Shlomo Y, *et al.* Auditory threshold, phonologic demand, and incident dementia. *Neurology* 2012;**79**:1583–90. doi:10.1212/WNL.0b013e31826e263d
- 37 Lin F, Metter EJ, O’Brien RJ, *et al.* Hearing loss and incident dementia. *Arch Neurol* 2011;**68**:214–20. doi:10.1001/archneurol.2010.362
- 38 Yamada Y, Denking MD, Onder G, *et al.* Dual Sensory Impairment and Cognitive Decline: The Results From the Shelter Study. *Journals Gerontol Ser A Biol Sci Med Sci* 2015;**71**:1–7. doi:10.1093/gerona/glv036
- 39 Parfyonov M, Mick P, Pichora-Fuller M, *et al.* Association between sensory loss and social outcomes: A preliminary report. *Can Acoust* 2016;**44**:124–5.
- 40 Mick P, Pichora-Fuller MK. Is Hearing Loss Associated with Poorer Health in Older Adults Who Might Benefit from Hearing Screening? *Ear Hear* 2016;**37**:e194–201. doi:10.1097/AUD.0000000000000267
- 41 Pryce H, Goberman-Hill R. ‘There’s a hell of a noise’: living with a hearing loss in residential care. *Age Ageing* 2012;**41**:40–6. doi:10.1093/ageing/afr112
- 42 Mitoku K, Masaki N, Ogata Y, *et al.* Vision and hearing impairments, cognitive impairment and mortality among long-term care recipients: a population-based cohort study. *BMC Geriatr* 2016;**16**:112. doi:10.1186/s12877-016-0286-2
- 43 Pye A, Charalambous AP, Leroi I, *et al.* Screening tools for the identification of dementia for adults with age-related acquired hearing or vision impairment: a scoping review. *Int Psychogeriatrics* 2017;:1–14. doi:10.1017/S104161021700120X
- 44 Bertone A, Wittich W, Watanabe DH, *et al.* The effect of age-related macular degeneration on non-verbal neuropsychological test performance. *Int Congr Ser* 2005;**1282**:26–30.
- 45 Wechsler D. *WAIS-III: Wechsler Adult Intelligence Scale (3rd ed.) Administration and Scoring Manual*. San Antonio, TX: : Psychological Corporation/Harcourt Brace 1997.
- 46 Wittich W, Phillips N, Nasreddine ZS, *et al.* Sensitivity and Specificity of the Montreal Cognitive Assessment Modified for Individuals Who Are Visually Impaired. *J Vis Impair Blind* 2010;**104**:360–8.
- 47 Nasreddine ZS, Phillips NA, Bedirian V, *et al.* The Montreal Cognitive Assessment, MoCA: a brief screening tool for mild cognitive impairment. *J Am Geriatr Soc* 2005;**53**:695–  
9.[http://www.ncbi.nlm.nih.gov/entrez/query.fcgi?cmd=Retrieve&db=PubMed&dopt=Citation&list\\_uids=15817019](http://www.ncbi.nlm.nih.gov/entrez/query.fcgi?cmd=Retrieve&db=PubMed&dopt=Citation&list_uids=15817019)
- 48 Lin VYWW, Chung J, Callahan BL, *et al.* Development of cognitive screening test for the severely hearing impaired: Hearing-impaired MoCA. *Laryngoscope* 2017;**127**:S4–11. doi:10.1002/lary.26590
- 49 Kergoat H, Law C, Chriqui E, *et al.* Tool for Screening Visual Acuity in Older Individuals With Dementia. *Am J Alzheimer’s Dis Other Dementias®* 2017;**32**:96–100. doi:10.1177/1533317517689877
- 50 Roets-Merken LM, Zuidema SU, Vernooij-Dassen MJFJ, *et al.* Screening for hearing, visual and dual sensory impairment in older adults using behavioural cues: A validation study. *Int J Nurs Stud* 2014;**51**:1434–40. doi:10.1016/j.ijnurstu.2014.02.006

- 1  
2  
3 51 McGilton KS, Höbler F, Campos J, *et al.* Hearing and vision screening tools for long-term  
4 care residents with dementia: protocol for a scoping review. *BMJ Open* 2016;**6**:e011945.  
5 doi:10.1136/bmjopen-2016-011945  
6  
7 52 Graham P, Evitts T, Thomas-MacLean R. Environmental scans: how useful are they for  
8 primary care research? *Can Fam Physician* 2008;**54**:1022–  
9 3.<http://www.ncbi.nlm.nih.gov/pubmed/18625830> (accessed 19 Nov 2017).  
10  
11 53 Rowel R, Moore ND, Nowrojee S, *et al.* The utility of the environmental scan for public  
12 health practice: lessons from an urban program to increase cancer screening. *J Natl Med*  
13 *Assoc* 2005;**97**:527–34.<http://www.ncbi.nlm.nih.gov/pubmed/15868772> (accessed 19 Nov  
14 2017).  
15 54 Williams JR. The Declaration of Helsinki and public health. *Bull World Health Organ*  
16 2008;**86**:650–1.  
17 55 Sibbald SL, McPherson C, Kothari A. Ontario primary care reform and quality  
18 improvement activities: an environmental scan. *BMC Health Serv Res* 2013;**13**:209.  
19 doi:10.1186/1472-6963-13-209  
20  
21 56 McGilton KS, Boscart VM, Brown M, *et al.* Making tradeoffs between the reasons to  
22 leave and reasons to stay employed in long-term care homes: Perspectives of licensed  
23 nursing staff. *Int J Nurs Stud* 2014;**51**:917–26. doi:10.1016/j.ijnurstu.2013.10.015  
24  
25 57 Whiting LS. Semi-structured interviews: guidance for novice researchers. *Nurs Stand*  
26 2008;**22**:35–40. doi:10.7748/ns2008.02.22.23.35.c6420  
27  
28 58 Graneheim UH, Lundman B. Qualitative content analysis in nursing research: concepts,  
29 procedures and measures to achieve trustworthiness. *Nurse Educ Today* 2004;**24**:105–12.  
30 doi:10.1016/j.nedt.2003.10.001  
31  
32 59 Hall W a, Long B, Bermbach N, *et al.* Qualitative teamwork issues and strategies:  
33 coordination through mutual adjustment. *Qual Health Res* 2005;**15**:394–410.  
34 doi:10.1177/1049732304272015  
35  
36 60 Wittich W, Southall K. Coping with extended facedown positioning after macular hole  
37 surgery: a qualitative diary analysis. *Nurs Res* 2008;**57**:436–  
38 43.[http://www.ncbi.nlm.nih.gov/entrez/query.fcgi?cmd=Retrieve&db=PubMed&dopt=Cit  
39 ation&list\\_uids=19018218](http://www.ncbi.nlm.nih.gov/entrez/query.fcgi?cmd=Retrieve&db=PubMed&dopt=Citation&list_uids=19018218)  
40  
41 61 Wittich W, Barstow EA, Jarry J, *et al.* Screening for sensory impairment in older adults:  
42 Training and practice of occupational therapists in Quebec. *Can J Occup Ther*  
43 2015;**82**:283–93. doi:10.1177/0008417415573076  
44  
45 62 Wittich W, Jarry J, Barstow E, *et al.* Vision and hearing impairment and occupational  
46 therapy education: Needs and current practice. *Br J Occup Ther* 2017;**30**:802261668485.  
47 doi:10.1177/0308022616684853  
48  
49 63 Wittich W, Jarry J, Groulx G, *et al.* Rehabilitation and Research Priorities in  
50 Deafblindness for the Next Decade. *J Vis Impair Blind* 2016;**110**:219–31.  
51  
52 64 Viau-Guay A, Bellemare M, Feillou I, *et al.* Person-Centered Care Training in Long-Term  
53 Care Settings: Usefulness and Facility of Transfer into Practice. *Can J Aging / La Rev Can  
54 du Vieil* 2013;**32**:57–72. doi:10.1017/S0714980812000426  
55  
56 65 Duffy M, Beliveau-Tobey M, De l'Aune W. Reaching Visually Impaired Elders in  
57 Longterm Care: A selfstudy Curriculum for Care Providers. *J Vis Impair Blind*  
58 1995;**89**:368–75.  
59  
60 66 Watson GR. Low vision in the geriatric population: rehabilitation and management. *J Am  
61 Geriatr Soc* 2001;**49**:317–30. doi:10.1046/j.1532-5415.2001.4930317.x  
62  
63  
64  
65  
66

- 1  
2  
3 67 Worrall L, Hickson L, Dodd B. Screening for Communication Impairment in Nursing  
4 Homes and Hostels. *Aust J Hum Commun Disord* 1994;**21**:53–64.  
5 68 Strawbridge WJ, Wallhagen MI. Simple Tests Compare Well with a Hand-held  
6 Audiometer for Hearing Loss Screening in Primary Care. *J Am Geriatr Soc* Published  
7 Online First: 11 August 2017. doi:10.1111/jgs.15044  
8  
9 69 Berkowitz SJ, Kung JW, Eisenberg RL, *et al.* Resident iPad Use: Has It Really Changed  
10 the Game? *J Am Coll Radiol* 2014;**11**:180–4. doi:10.1016/j.jacr.2013.04.017  
11 70 Lehnborn EC, Adams K, Day RO, *et al.* iPad use during ward rounds: an observational  
12 study. *Stud Health Technol Inform* 2014;**204**:67–  
13 73. <http://www.ncbi.nlm.nih.gov/pubmed/25087529> (accessed 29 Aug 2017).  
14  
15  
16  
17  
18  
19  
20  
21  
22  
23  
24  
25  
26  
27  
28  
29  
30  
31  
32  
33  
34  
35  
36  
37  
38  
39  
40  
41  
42  
43  
44  
45  
46  
47  
48  
49  
50  
51  
52  
53  
54  
55  
56  
57  
58  
59  
60



## COREQ (CONsolidated criteria for REporting Qualitative research) Checklist

A checklist of items that should be included in reports of qualitative research. You must report the page number in your manuscript where you consider each of the items listed in this checklist. If you have not included this information, either revise your manuscript accordingly before submitting or note N/A.

| Topic                                          | Item No. | Guide Questions/Description                                                                                                                              | Reported on Page No. |
|------------------------------------------------|----------|----------------------------------------------------------------------------------------------------------------------------------------------------------|----------------------|
| <b>Domain 1: Research team and reflexivity</b> |          |                                                                                                                                                          |                      |
| <i>Personal characteristics</i>                |          |                                                                                                                                                          |                      |
| Interviewer/facilitator                        | 1        | Which author/s conducted the interview or focus group?                                                                                                   | 7                    |
| Credentials                                    | 2        | What were the researcher's credentials? E.g. PhD, MD                                                                                                     | 7                    |
| Occupation                                     | 3        | What was their occupation at the time of the study?                                                                                                      | 7                    |
| Gender                                         | 4        | Was the researcher male or female?                                                                                                                       | 7                    |
| Experience and training                        | 5        | What experience or training did the researcher have?                                                                                                     | 7                    |
| <i>Relationship with participants</i>          |          |                                                                                                                                                          |                      |
| Relationship established                       | 6        | Was a relationship established prior to study commencement?                                                                                              | 7                    |
| Participant knowledge of the interviewer       | 7        | What did the participants know about the researcher? e.g. personal goals, reasons for doing the research                                                 | 7                    |
| Interviewer characteristics                    | 8        | What characteristics were reported about the interviewer/facilitator? e.g. Bias, assumptions, reasons and interests in the research topic                | 7                    |
| <b>Domain 2: Study design</b>                  |          |                                                                                                                                                          |                      |
| <i>Theoretical framework</i>                   |          |                                                                                                                                                          |                      |
| Methodological orientation and Theory          | 9        | What methodological orientation was stated to underpin the study? e.g. grounded theory, discourse analysis, ethnography, phenomenology, content analysis | 7                    |
| <i>Participant selection</i>                   |          |                                                                                                                                                          |                      |
| Sampling                                       | 10       | How were participants selected? e.g. purposive, convenience, consecutive, snowball                                                                       | 7                    |
| Method of approach                             | 11       | How were participants approached? e.g. face-to-face, telephone, mail, email                                                                              | 7                    |
| Sample size                                    | 12       | How many participants were in the study?                                                                                                                 | 7                    |
| Non-participation                              | 13       | How many people refused to participate or dropped out? Reasons?                                                                                          | 8                    |
| <i>Setting</i>                                 |          |                                                                                                                                                          |                      |
| Setting of data collection                     | 14       | Where was the data collected? e.g. home, clinic, workplace                                                                                               | 7                    |
| Presence of non-participants                   | 15       | Was anyone else present besides the participants and researchers?                                                                                        | 7                    |
| Description of sample                          | 16       | What are the important characteristics of the sample? e.g. demographic data, date                                                                        | table 2              |
| <i>Data collection</i>                         |          |                                                                                                                                                          |                      |
| Interview guide                                | 17       | Were questions, prompts, guides provided by the authors? Was it pilot tested?                                                                            | table 1              |
| Repeat interviews                              | 18       | Were repeat interviews carried out? If yes, how many?                                                                                                    | n/a                  |
| Audio/visual recording                         | 19       | Did the research use audio or visual recording to collect the data?                                                                                      | 8                    |
| Field notes                                    | 20       | Were field notes made during and/or after the interview or focus group?                                                                                  | n/a                  |
| Duration                                       | 21       | What was the duration of the interviews or focus group?                                                                                                  | 8                    |
| Data saturation                                | 22       | Was data saturation discussed?                                                                                                                           | 17                   |
| Transcripts returned                           | 23       | Were transcripts returned to participants for comment and/or                                                                                             | n/a                  |

| Topic                                  | Item No. | Guide Questions/Description                                                                                                        | Reported on Page No. |
|----------------------------------------|----------|------------------------------------------------------------------------------------------------------------------------------------|----------------------|
|                                        |          | correction?                                                                                                                        |                      |
| <b>Domain 3: analysis and findings</b> |          |                                                                                                                                    |                      |
| <i>Data analysis</i>                   |          |                                                                                                                                    |                      |
| Number of data coders                  | 24       | How many data coders coded the data?                                                                                               | 8-9                  |
| Description of the coding tree         | 25       | Did authors provide a description of the coding tree?                                                                              | Table 3              |
| Derivation of themes                   | 26       | Were themes identified in advance or derived from the data?                                                                        | 9                    |
| Software                               | 27       | What software, if applicable, was used to manage the data?                                                                         | n/a                  |
| Participant checking                   | 28       | Did participants provide feedback on the findings?                                                                                 | n/a                  |
| <i>Reporting</i>                       |          |                                                                                                                                    |                      |
| Quotations presented                   | 29       | Were participant quotations presented to illustrate the themes/findings?<br>Was each quotation identified? e.g. participant number | 9-15                 |
| Data and findings consistent           | 30       | Was there consistency between the data presented and the findings?                                                                 | 9-15                 |
| Clarity of major themes                | 31       | Were major themes clearly presented in the findings?                                                                               | 9-15                 |
| Clarity of minor themes                | 32       | Is there a description of diverse cases or discussion of minor themes?                                                             | 9-15                 |

Developed from: Tong A, Sainsbury P, Craig J. Consolidated criteria for reporting qualitative research (COREQ): a 32-item checklist for interviews and focus groups. *International Journal for Quality in Health Care*. 2007. Volume 19, Number 6: pp. 349 – 357

**Once you have completed this checklist, please save a copy and upload it as part of your submission. DO NOT include this checklist as part of the main manuscript document. It must be uploaded as a separate file.**

# BMJ Open

## Recommendations for successful sensory screening in older adults with dementia in long-term care: A qualitative environmental scan of Canadian specialists

|                                 |                                                                                                                                                                                                                                                                                                                                                                                                                          |
|---------------------------------|--------------------------------------------------------------------------------------------------------------------------------------------------------------------------------------------------------------------------------------------------------------------------------------------------------------------------------------------------------------------------------------------------------------------------|
| Journal:                        | <i>BMJ Open</i>                                                                                                                                                                                                                                                                                                                                                                                                          |
| Manuscript ID                   | bmjopen-2017-019451.R2                                                                                                                                                                                                                                                                                                                                                                                                   |
| Article Type:                   | Research                                                                                                                                                                                                                                                                                                                                                                                                                 |
| Date Submitted by the Author:   | 12-Dec-2017                                                                                                                                                                                                                                                                                                                                                                                                              |
| Complete List of Authors:       | Wittich, Walter; Universite de Montreal, School of Optometry; Centre de recherche interdisciplinaire en readaptation du Montreal metropolitain, MAB-Mackay & Institut Nazareth et Louis-Braille<br>Hobler, Fiona; Toronto Rehabilitation Institute, Research; University of Toronto, Speech-Language Pathology<br>Jarry, Jonathan; Universite de Montreal, School of Optometry<br>McGilton, Kathy; University of Toronto |
| <b>Primary Subject Heading</b>: | Nursing                                                                                                                                                                                                                                                                                                                                                                                                                  |
| Secondary Subject Heading:      | Qualitative research, Ophthalmology, Mental health, Geriatric medicine, Ear, nose and throat/otolaryngology                                                                                                                                                                                                                                                                                                              |
| Keywords:                       | Dementia < NEUROLOGY, vision impairment, hearing loss, Screening                                                                                                                                                                                                                                                                                                                                                         |
|                                 |                                                                                                                                                                                                                                                                                                                                                                                                                          |

SCHOLARONE™  
Manuscripts

Only



1  
2  
3 **Recommendations for successful sensory screening in older adults with dementia in long-**  
4  
5 **term care: A qualitative environmental scan of Canadian specialists**

6  
7 Walter Wittich<sup>1,2,3</sup>, Fiona Höbler<sup>4,5</sup>, Jonathan Jarry<sup>1,2</sup>, Kathy McGilton<sup>4,6</sup>,

- 8  
9  
10 1) School of Optometry, University of Montreal, Montreal, Quebec, Canada  
11  
12 2) CRIR/Centre de réadaptation MAB-Mackay du CIUSSS du Centre-Ouest-de-l'Île-de-  
13  
14 Montréal  
15  
16 3) CRIR/Institut Nazareth et Louis-Braille du CISSS de la Montérégie-Centre  
17  
18 4) Department of Research, Toronto Rehabilitation Institute-University Health Network,  
19  
20 Toronto, Ontario, Canada  
21  
22 5) Department of Speech-Language Pathology, University of Toronto, Toronto,  
23  
24 Ontario, Canada  
25  
26 6) Lawrence S. Bloomberg Faculty of Nursing, University of Toronto, Ontario,  
27  
28 Canada  
29  
30  
31  
32  
33  
34

35 Corresponding author:

36  
37 Walter Wittich, PhD FAAO CLVT

38 Assistant Professor, School of Optometry Université de Montréal

39  
40 3744, rue Jean-Brillant, 260-7

41  
42 Montréal, (Québec) H3T 1P1

43  
44 Tel. 514 343 7962; Fax. 514 343 2382

45  
46 [walter.wittich@umontreal.ca](mailto:walter.wittich@umontreal.ca)

47  
48  
49  
50  
51  
52  
53 Keywords: nursing, long-term care, sensory screening, hearing loss, vision loss

54  
55 Word count: 4910

## ABSTRACT

**Objectives** – This study aimed to identify screening tools, technologies, and strategies that vision- and hearing-care specialists recommend to front-line healthcare professionals for the screening of older adults in long-term care homes who have dementia.

**Setting:** An environmental scan of healthcare professionals took place via telephone interviews between December 2015 and March 2016. All interviews were audio-recorded, transcribed, proofed for accuracy, and their contents thematically analyzed by two members of the research team.

**Participants** – A convenience sample of eleven professionals from across Canada specializing in the fields of vision- and hearing healthcare and technology for older adults with cognitive impairment were included in the study.

**Outcome measures**– As part of a larger mixed-methods project, this qualitative study used semi-structured interviews and their subsequent content analysis.

**Results** - Following a two-step content analysis of interview data, coded citations were grouped into three main categories: 1) barriers, 2) facilitators, and 3) tools and strategies that do or do not work for sensory screening of older adults with dementia. We report on the information offered by participants within each of these themes, along with a summary of tools and strategies that work for screening older adults with dementia

**Conclusions** – Recommendations from sensory specialists to nurses working in long-term care included the need for improved inter-professional communication and collaboration, as well as flexibility, additional time, and strategic use of clinical intuition and ingenuity. These suggestions at times contradicted the realities of service provision or the need for standardized and validated measures.

### Strengths and Limitations of this Study

- This study provides a unique opportunity for inter-professional knowledge translation by drawing on the clinical experience of experts in vision- and hearing-healthcare who specialize in providing services to older adults with dementia, in order to let nurses working in long-term care benefit from their expertise when screening for sensory impairments.
- By taking advantage of a qualitative research approach, this study is able to provide a description of directly applicable tools and strategies for sensory screening with older adults whose ability to respond to standardized traditional screening techniques may be impaired due to their cognitive limitations.
- The results highlight the challenge of bridging the gap between the professional expectations of rigor and standardization in sensory assessment, and the realities of practice in a long-term care environment.
- Generalization of the findings is limited by the small sample size (n = 11), narrow recruitment region (Canada) and the focus on stakeholders in sensory care only.

## INTRODUCTION

As we age, our sensory capacities decline, which is reflected in the increased prevalence rates of hearing and visual loss in older adults. Hearing loss has been estimated to affect up to 50% of individuals 65 years of age and older [1], and vision impairment has been reported to affect 18% of those aged 70 years and over [2]. Together, vision and hearing loss, known as dual-sensory impairment (DSI), increases from a prevalence of less than 1% in persons younger than 70 years to 11.3% in adults aged 80 years or over, at which point over 80% of adults are affected by at least one sensory impairment [3]. Impaired sensory abilities are seen to be significantly more prevalent in older adults who are also experiencing cognitive decline. The most common type of dementia is Alzheimer's disease and is seen to increase dramatically in prevalence from 1.7-3% of adults aged over 65 years to 32% amongst those aged 85 years and older, and above 40% in those older than over 95 years of age [4,5]. Hearing loss has been found in over 90% of adults with cognitive impairment [6], and is highly correlated with the presence of cognitive problems[7], while visual impairment has been reported in more than 30% of individuals with dementia [8]. The neuro-degeneration that characterizes dementia likely has multifactorial causes [9] and involves and affects multiple cortical networks, including brain regions that support auditory and visual function [10–12]. Even though research on the underlying causal relationships between cognitive and sensory decline has not yet reached consensus [7,13], it is already clear that many factors related to aging and frailty are involved [14–16].

Hearing and vision impairments continue to be under-diagnosed and under-treated in this vulnerable population of older adults with cognitive impairment [8,17], even though adapted rehabilitation interventions for individuals with sensory loss have been presented [18] and

1  
2  
3 evidence exists for the improvement of cognitive functioning after sensory interventions [19,20].  
4  
5 The decline of older adults' cognitive and functional status and the severity of their disabilities  
6  
7 are reported risk factors for institutionalization into nursing and long-term care homes (LTCHs)  
8  
9 [21–23]. In fact, the prevalence of impaired sensory capacity is disproportionately higher in  
10  
11 people with dementia living in care homes [8] than amongst older adults living in the  
12  
13 community, with one third of residents in this setting having a single sensory impairment and an  
14  
15 additional third experiencing DSI [24]. Furthermore, over half of such cases have been shown to  
16  
17 be unreported [25], with under-diagnosis by the appropriate specialist due to lack of service  
18  
19 utilization [8] or those documented being untreated due to underutilization of rehabilitative  
20  
21 services by older adults [26,27].  
22  
23  
24  
25

26 The importance of appropriately identifying the sensory capacity in individuals with  
27  
28 dementia is not only underscored by their incommensurate prevalence rates and the need to  
29  
30 accurately determine the person's true cognitive status, but has been established as a healthcare  
31  
32 and research priority by those living with dementia themselves [28]. Furthermore, nurses and  
33  
34 other health care professionals responsible for the care of older adults with dementia have  
35  
36 reported the difficulty of differentiating between sensory and cognitive impairment in affected  
37  
38 residents [29]. Höbler et al. and others have also requested the provision of more specific  
39  
40 education on the appropriate methods of evaluating sensory impairment amongst residents  
41  
42 [30,31]. Prioritization of identifying the sensory capacity of older adults is further supported by  
43  
44 evidence of accelerated cognitive decline [32,33] and increased risk of incident dementia in those  
45  
46 with sensory impairment [34–36], as hearing impairment in particular can impact on all domains  
47  
48 of cognition [7]. Moreover, residents with impairment of both vision and hearing demonstrate  
49  
50 significantly higher incidence of new behavioral symptoms [24], and accelerated cognitive  
51  
52  
53  
54  
55  
56  
57  
58  
59  
60

1  
2  
3 decline due to lack of social engagement [37], which is, in turn, significantly associated with  
4 untreated sensory loss [38–40]. A recent study has also shown that cognitive impairment is most  
5 common in long-term care residents with DSI and that these individuals are at increased risk of  
6 mortality [41].  
7  
8  
9  
10

11  
12 The process of screening, assessment and evaluation of sensory and cognitive impairment  
13 in older adults has been researched in a variety of ways. Some researchers have examined how to  
14 evaluate cognition in persons who have either a hearing or a vision loss, both of which can  
15 interfere with the administration of cognitive testing procedures [42]. For example, Bertone and  
16 colleagues [43] magnified sub-tests of the Wechsler Adult Intelligence Scale [44] in order to  
17 make them accessible and visible for persons with central vision loss due to age-related macular  
18 degeneration. Wittich et al. [45] provided validation data for the Montreal Cognitive Assessment  
19 (MoCA) [46] in its blind version, which can be administered verbally only. Similarly, Lin et al.  
20 [47] developed a procedure to administer the MoCA to individuals with severe hearing  
21 impairment by making the test instructions available as a PowerPoint presentation, thereby  
22 avoiding problems of audibility. Other researchers have focused on the reverse of this approach,  
23 whereby they examined how vision or hearing testing can be adapted to individuals with  
24 cognitive decline [48,49]. Traditional testing procedures often require a response from the person  
25 tested as to whether the stimuli are seen or heard. However, in the presence of cognitive  
26 impairment, such “true” responses are potentially impacted by a variety of factors, including  
27 attention, comprehension, recall, focus, impairment severity, only to mention a few, and may  
28 need to be extrapolated in a different way. Therefore, the focus of the present study is on this  
29 adapted approach to sensory testing, and how nurses working in long-term care homes may be  
30 able to facilitate screening for sensory loss.  
31  
32  
33  
34  
35  
36  
37  
38  
39  
40  
41  
42  
43  
44  
45  
46  
47  
48  
49  
50  
51  
52  
53  
54  
55  
56  
57  
58  
59  
60

## Objectives

To address the urgent need of appropriate evaluation and treatment of sensory impairment in adults already experiencing cognitive decline, we conducted an environmental scan with professionals working in the field of health technology, optometry, ophthalmology, audiology, and dual sensory impairment, which was part of a larger mixed-methods project investigating suitable vision and hearing screening measures for older adults with dementia that could be used by nurses working in long-term care [50]. The main purpose of this environmental scan was to identify screening tools, old and new technologies, and assessment strategies that sensory healthcare specialists find suitable for screening older adults who have dementia, and was carried out complementary to an environmental scan with nurses who work with residents who have dementia in LTCHs) [31].

## METHODS

Following the completion of a review of the literature on hearing and vision screening tools as per our protocol [50], this second step of the investigation was carried out in order to identify what tools, technologies and strategies are currently being used by vision and hearing professionals when serving older adults with cognitive impairment. To accomplish this, we employed an environmental scan. In healthcare research, the environmental scan is often employed as a needs-assessment tool for the purposes of improving and developing the efficiency of health service programs and evidence-based policies [51,52]. In using this approach, environmental or contextual factors are evaluated by reviewing existing data or actively collecting new data in the form of surveys or interviews, including a diversity of views and information, to determine the benefits, needs and efficiencies of practices within that environment [51]. As in the literature review, a broad definition of measures and technologies

1  
2  
3 was adopted, to include paper-based tests, software solutions such as apps and extensions for  
4 mobile devices, and higher-tech devices such as portable ophthalmic or audiometric equipment,  
5  
6 as well as informal assessment strategies used with residents who had dementia or limited  
7  
8 cognitive or communication abilities.  
9  
10

11  
12 The scan was conducted by a clinically trained member of the research team (FH, MSc,  
13 female), who interviewed participating professionals about: their thoughts and experiences of  
14 using tools, technologies, and strategies to screen for vision or hearing impairment in persons  
15 who have dementia, the tools and strategies they have found to be most useful, the ways in which  
16 current measures could be improved, and what they consider to be key elements for inclusion in  
17 a sensory screening package (see Table 1). This research was completed with the approval of the  
18 Research Ethics Boards of the University Health Network, Toronto, Canada, and in accordance  
19 with The Code of Ethics of the World Medical Association (Declaration of Helsinki) for  
20 experiments involving humans [53]. All participants provided informed written consent before  
21 enrolling in the study.  
22  
23  
24  
25  
26  
27  
28  
29  
30  
31  
32  
33  
34  
35  
36  
37

## 38 **PARTICIPANTS**

39  
40 A convenience sample of eleven professionals from across Canada with expertise in  
41 vision, hearing, dual sensory impairment or healthcare technologies were recruited through their  
42 connections with members of the larger study team or through referral by participants already  
43 enrolled in or contacted about the study. Based on previous research with similar methodological  
44 approaches [54,55], the sample size was seen as sufficient for the data collection purposes of the  
45 present study. The research coordinator (FH) made initial contact with potential candidates by  
46 email or by phone. Eleven participants agreed to take part in this study, while one candidate  
47  
48  
49  
50  
51  
52  
53  
54  
55  
56  
57  
58  
59  
60



1  
2  
3 declined due to a perceived lack of expertise in the area, and another due to time constraints  
4  
5 during the data collection period. Participant characteristics of all interviewees included in this  
6  
7 study are summarized in Table 2.  
8  
9

## 10 11 12 **DATA COLLECTION** 13

14  
15 By use of a semi-structured guide, the environmental scan interviews took place via  
16  
17 telephone between December 2015 and March 2016. After receiving background information on  
18  
19 the study, its purpose, as well as answers to any questions they had, written informed consent  
20  
21 was received from all participants at the time of or prior to data collection via email or fax. The  
22  
23 interview protocol was applied in relevance to the participants' area of expertise (i.e., vision,  
24  
25 hearing or dual sensory loss), and participants were encouraged to offer any additional  
26  
27 information they felt was applicable to the study's objectives and/or that had not been covered by  
28  
29 the semi-structured interview script [56]. Two participants were interviewed together upon  
30  
31 request, resulting in a total of 10 interviews with 11 participants being conducted. There was no  
32  
33 time limit applied to the interviews, with these having a mean duration of 40 min 30.66 s [SD =  
34  
35 11.83 min, range 19 to 54 min.].  
36  
37  
38  
39  
40  
41

## 42 **DATA ANALYSIS** 43

44  
45 All interviews were audio-recorded, transcribed by a third party, and proofed for  
46  
47 accuracy by a member of the research team [FH]. Following full anonymization of the data sets,  
48  
49 the transcribed contents of the interviews underwent thematic analysis [57]. Two members of the  
50  
51 research team (WW, PhD; JJ, MSc) analyzed all sets to identify data relating to the following:  
52  
53 tools/strategies that work for screening (vision/hearing), tools/strategies that do not work for  
54  
55  
56  
57  
58  
59

1  
2  
3 screening, and tools/strategies that may work. This data analysis followed a coding protocol in  
4 which data was first coded as a Tool or Strategy, and secondly whether it was reported to work  
5 or not, then as to whether it applied to vision or hearing screening. For example, “T+H”, which  
6 denoted a measured that was reported to work well for hearing screening, or “S?V”, which  
7 denoted a strategy that may work for vision. Additional codes related to information reported as:  
8 a “golden quote”, a sentence or paragraph that is striking or characteristic, the name of a tool  
9 when first mentioned (e.g., Snellen chart), a barrier to sensory screening, a recommendation on  
10 what should be done according to the participant, other content of interest, as well as any “red  
11 flag” or risk factor or other trigger for screening (e.g. diabetes, missing hearing aid, missing  
12 glasses). During a second level of thematic analysis, the extracted data from the first level were  
13 again analyzed for the identification of prominent themes in the interviews with participants.  
14 Agreement was achieved through the concurrent coding and discussion involving both analysts  
15 (WW, JJ), and differences in opinion when interpreting content were resolved face to face [58],  
16 an approach that members of the team have previously utilized successfully [59–62]. These  
17 themes are reported below.

## 37 FINDINGS

38  
39  
40 Following a two-step content analysis of interview data, coded citations were grouped  
41 into three main themes: 1) *barriers*, 2) *facilitators*, and 3) *tools and strategies that related to the*  
42 *screening of older adults with dementia*. Here we report on the information offered by  
43 participants within each of these themes. In addition, we present a summary of tools and  
44 strategies that work for screening older adults with dementia (see Table 3). Direct participants’  
45 quotes are presented in italics below, whereby each quote is identified by the source code.

### 54 Facilitators

1  
2  
3 Our interviewees identified few *facilitators*, as they were more likely to share barriers to  
4 their work. The main enablers of sensory screening in residents with dementia were indeed other  
5 people. The clients themselves can become facilitators and advocates, as can family members,  
6  
7  
8 activation workers, as well as long-term care facility staff.  
9  
10

11  
12 An audiologist pointed out that hearing screening clinics in long-term care facilities can  
13 be organized by a facility employee:  
14

15  
16  
17 *I'm thinking we could get called in to do a screening, we could have an activation worker*  
18  
19 *in a long-term care facility say, "I would like to have a hearing screening clinic." [participant*  
20  
21 *4]*  
22

23  
24 Local support by staff and residents can help bring awareness of hearing loss to others:  
25

26  
27 *It's not always possible for me, as an audiologist, to be everywhere and see everyone, so*  
28  
29 *to have staff members also be advocates for hearing is very important and, you know, to have*  
30  
31 *residents themselves be advocates for hearing. [participant 5]*  
32

33  
34 The nurses, whose lack of availability was often branded as a barrier, were once  
35 mentioned in a more positive context:  
36

37  
38 *The nurse manager on that unit was very receptive to having some audiological*  
39  
40 *intervention on her unit, and so we actually designed a simple screening program there,*  
41  
42 *because she wanted the nurses to be able to do the screening [...]. And she felt that it was*  
43  
44 *important to get the nurses on her unit involved in that screening. [participant 2]*  
45  
46  
47  
48

## 49 **Barriers**

50  
51 In the interviews with vision and hearing specialists on the subject of sensory screening in  
52 residents with a cognitive impairment, the two barriers to screening that were most often  
53  
54  
55  
56  
57  
58  
59  
60

1  
2  
3 repeated were *impaired communication* and *lack of staff involvement* . Impaired communication  
4  
5 can mean not knowing if a client's answer is reliable; not being able to use traditional means of  
6  
7 communication; or not being able to communicate at all when the neurological condition is too  
8  
9 advanced. One interviewee explained:

10  
11  
12 *And when we are at the long-term care facility, [...] some of [our residents] are*  
13  
14 *completely unresponsive, which of course is a challenge and, other times, it's just they*  
15  
16 *require more encouragement, constant repetition to remind them of the task that we're*  
17  
18 *doing, that kind of thing. [participant 7]*

19  
20  
21 Since many screening tests rely on self-report, impaired communication can jeopardize  
22  
23 subjective assessments:

24  
25  
26 *In the more advanced stages of dementia, it's very difficult to get a pure-tone audiogram,*  
27  
28 *because pure-tones become meaningless, so you have to use more meaningful stimuli.*  
29  
30  
31 *[participant 2]*

32  
33 Many sensory experts flagged the lack of staff involvement in the screening of persons  
34  
35 for hearing and vision loss. Some reported that educating the staff on the need to screen for  
36  
37 sensory loss was not helpful, as it is not a mandatory training activity for nurses. Participants  
38  
39 speculated that this absence may, in part, be due to policies or regulations that do not include or  
40  
41 promote sensory screening, lack of education and training on how to screen, or not prioritizing  
42  
43 hearing and vision screening given the multiple demands on their time. Moreover, screening by  
44  
45 staff is not always systematic:

46  
47  
48  
49 *We did find that the nurses, number one, only bothered to do [...] their screening on 50%*  
50  
51 *of the intake of the people that were admitted. And furthermore, failed to identify 40% of*  
52  
53 *the people that the student identified with the more extensive screening. [participant 2]*  
54  
55  
56  
57  
58  
59

1  
2  
3 Additional barriers that were less frequently mentioned were: hearing loss denial; lack of  
4 cooperation by the client's family; discomfort vis-à-vis the physical closeness often required for  
5 sensory screening; environmental noises during hearing screening; the presence of a combined  
6 hearing and vision loss; and the limitations of portable equipment often necessary for these on-  
7 location screenings.  
8  
9  
10  
11  
12  
13

### 14 **Strategies and Tools**

15  
16 Given the specific characteristics of people with a cognitive impairment, our specialists  
17 frequently suggested *strategies* to conduct sensory screening. We defined these as adaptations or  
18 behavioural accommodations in order to administer a particular screening tool, such as choosing  
19 a specific location or speed of administration. While certain strategies were unique to either  
20 vision or hearing screening, many such adaptations were mentioned by both groups of experts.  
21 By far the most common strategy was to *improve communication*. Many specialists highlighted  
22 the importance of establishing a friendly rapport with the client before screening, of reassuring  
23 and encouraging them throughout the procedure. Sometimes, repetition was key:  
24  
25  
26  
27  
28  
29  
30  
31  
32  
33  
34

35 *They require more encouragement, constant repetition to remind them of the task that*  
36 *we're doing. [participant 7]*  
37  
38

39  
40 Often, according to our interviewees, the client may not provide the type of feedback  
41 traditionally required by the subjective screen, emphasizing the value of flexibility. The response  
42 to "Can you see this?" or "Can you hear this?" can be a smile, a number of raised fingers, or a  
43 movement of the eye:  
44  
45  
46  
47  
48

49 *I remember one woman that was singing constantly, but she would stop singing when she*  
50 *could hear me, so that was one way of finding information. [participant 2]*  
51  
52  
53

54 It may also mean playing along with a resident's own understanding of the situation:  
55  
56  
57  
58  
59  
60

1  
2  
3 *One man believed he was being assessed to join the Greek military and so he was reading*  
4 *all of the letters on the Snellen chart in Greek. And I don't speak Greek and so we also*  
5 *bring a number chart with us. So, he was reading those out in Greek but at least there*  
6 *were only nine numbers for me memorize. So, I just started accepting Greek readings of*  
7 *the numbers instead and kind of learning Greek numeric system as we went. [participant*  
8 *10]*

9  
10  
11  
12  
13  
14  
15  
16  
17 The *preference for familiarity* was a recurring strategy mentioned by both hearing and  
18 vision specialists, such as choosing a familiar room and having a person the client trusts sitting  
19 by their side during the screening. Considerations of *time* were brought up as well: examples  
20 included screening on the right day, with breaks during the procedure, and the possibility of  
21 resting or finishing another day:

22  
23  
24  
25  
26  
27  
28 *Sometimes the assessment needs to be done over several appointments [participant 5].*

29  
30  
31 Finally, information can be gathered indirectly through *staff, family, and behaviour*. The  
32 latter, we were told, can serve as a clue to impairment:

33  
34  
35 *One of the most helpful things is having family there to at least give us a little bit of*  
36 *background about the resident, about things that they may have liked to have done when*  
37 *they were not at the long-term care facility such as reading or knitting, activities that they*  
38 *haven't been doing lately which could be because of their vision problems, either glasses*  
39 *or having some sort of eye condition that needs to be treated. [participant 3]*

40  
41  
42  
43  
44  
45  
46  
47 A small number of strategies were mentioned exclusively by vision specialists, while a  
48 much longer list could be drawn from the input of the hearing experts (see Table 3). Since  
49 hearing screening often relies on the playback of tones through headphones, it is interesting to  
50  
51  
52  
53  
54  
55  
56  
57  
58  
59  
60

1  
2  
3 note that interviewees disagreed amongst themselves as to whether or not ear buds were  
4  
5 preferable to headsets for this population. Some clients may prefer the former:  
6

7  
8 *If you come at somebody with a headset, often that's a bit alarming and they immediately*  
9  
10 *don't want to cooperate; but I've found that they're more compliant with insert phones.*

11  
12 *[participant 2]*

13  
14 while others are more at ease with the latter:

15  
16  
17 *I haven't had issues with people putting on headsets. [...] I'm not sold on removing the*  
18  
19 *idea of a headset."* *[participant 4]*

20  
21 The above-mentioned strategies highlight that no one method of screening works for  
22  
23 everyone as some residents preferred headsets while others preferred phones. For both vision and  
24  
25 hearing, experts spoke of numerous tools they considered either to work, to not work, or to  
26  
27 possibly work with this population (see Table 3). On the hearing side, speech testing was often  
28  
29 mentioned as providing more meaningful stimuli to a client with a cognitive impairment than a  
30  
31 pure-tone audiogram: indeed, the latter test ended up both being recommended and being  
32  
33 rejected depending on the interviewee. Meanwhile, for either sense, very few of our participants  
34  
35 qualified themselves as knowledgeable on the topic of screening apps, such as Peek™ for vision  
36  
37 testing. They often knew of these portable technologies but had rarely used them. These apps  
38  
39 elicited the following concerns: that they were not designed or validated for use in a context of  
40  
41 dementia; that they relied on batteries that need to be recharged; and that the hardware (i.e. cell  
42  
43 phone or tablet screen and camera) is not professional grade. Still, many interviewees wanted to  
44  
45 see data on how they compared to traditional screening methods and were even willing to try  
46  
47 them out for themselves.  
48  
49  
50  
51  
52  
53  
54  
55  
56  
57  
58  
59  
60

1  
2  
3 A recurring comment on the part of audiologists spanned multiple coding categories,  
4 acting as a barrier, forming a recommendation, and being suggested as a screening tool that  
5 works for hearing: the *presence of wax* and its removal through otoscopy. As one hearing expert  
6  
7  
8  
9  
10 put it:

11  
12 *I think all screening should be accompanied by otoscopic examination, because one other*  
13  
14 *thing I've learned is that many seniors, especially those in the nursing homes, they don't*  
15  
16 *tend to get kind of routine ear exams, tend to have accumulations of wax that would*  
17  
18 *definitely be possibly interfering with their hearing. So having that wax removed before*  
19  
20 *you do any testing, is really important. [...] Anybody who's getting involved with*  
21  
22 *screening of seniors' hearing needs to have some training in cerumen management,*  
23  
24 *certainly. [participant 2]*  
25  
26  
27  
28  
29

## 30 **DISCUSSION**

31  
32  
33 The purpose of the present study was to explore the advice of specialists in the field of  
34 sensory health care for older adults with dementia, in order to develop recommendations for  
35 nurses working in long-term care facilities to be able to better screen their residents for the  
36 presence of vision and/or hearing loss. The participants reported on several facilitators and  
37 barriers, and how these can each be strengthened and overcome through adaptive strategies.  
38  
39  
40 Ideally, a screening protocol would be able to examine vision and hearing function  
41  
42 simultaneously or during the same testing opportunity, because time is often sparse and the  
43 pressures on health care providers are many. However, one central theme, common among the  
44 suggested approaches, was to allow and encourage clients (and clinicians) to take their time  
45  
46 when engaging in the testing of sensory functioning, as subtle information and behavioural cues  
47  
48  
49  
50  
51  
52  
53  
54  
55  
56  
57  
58  
59  
60



1  
2  
3 often become the true source of information in sensory screening, and may then be lost if  
4  
5 rigorously standardized (and fast) protocols are adhered to.  
6

7  
8 In this particular population, sensory screening methods need to be flexible enough to  
9  
10 accommodate a range of cognitive resources, whereby individuals with mild cognitive  
11  
12 impairments may well be able to complete normal testing procedures if given the chance and the  
13  
14 time. Those with moderate to severe cognitive impairment, however, may require adjustments in  
15  
16 the administration of screening measures and strategies, led by use of clinical judgment and  
17  
18 intuition. Such approaches can easily be supplemented with the use of questionnaires (or a  
19  
20 subsection of questions therein), as well as more objective measures in order to ensure reliability  
21  
22 of test results. Ideally, the stimuli that are used are meaningful to the resident (e.g., their name)  
23  
24 and are speech-based because of their ecological importance over pure tones. When simplicity  
25  
26 was important, the use of numbers (both for speech as well as vision testing) was recommended.  
27  
28 In addition, the use of pictograms or picture-matching was a proposed possibility to elicit  
29  
30 responses. In addition, making sure the methods of screening aligned with the residents  
31  
32 preferences (phones or headsets) is essential for a quality screening result. Finally, our  
33  
34 respondents expressed openness to using and exploring the potential of new technologies, such  
35  
36 as apps and devices, for screening purposes. However, their own experience with current  
37  
38 technologies was limited and they expressed concerns about their validity and availability, thus,  
39  
40 recommending that technologies require further development in order to serve this population.  
41  
42 A strength of the present study is its range of professionals and their level of expertise in  
43  
44 providing services to older adults with sensory and cognitive impairments; despite their number  
45  
46 being relatively small, data saturation was reached when assessed. In addition, this study tackles  
47  
48 cross-disciplinary communication barriers by bringing specialist recommendations to the  
49  
50  
51  
52  
53  
54  
55  
56  
57  
58  
59  
60

1  
2  
3 attention of nurses. We were able to replicate previous reports on the barriers and challenges that  
4 are encountered when providing sensory care to older adults in LTCHs, including difficulties in  
5 client's willingness to participate in the assessment (at times expressed as aggression or anxiety)  
6 as well as communication difficulties linked to cognitive losses, resulting in confusion (both at  
7 the part of the client and the clinician) [30]. Communication recommendations were in line with  
8 previous suggestions to adjust speech volume, speed, and body positioning face-to-face [29]. In  
9 addition, the present data are in agreement with previous reports about the necessity for  
10 flexibility in the testing procedure, such as the need to determine the optimal time of day for each  
11 individual to be tested, the option to pause and continue testing as needed, along with taking care  
12 to avoid fatigue or frustration on the part of the client [48].  
13  
14  
15  
16  
17  
18  
19  
20  
21  
22  
23  
24  
25

26 Our study needs to be viewed within certain limitations; for example, the logistics of data  
27 collection and imposed time and funding restrictions limited the recruitment scope, thereby only  
28 including participants within Canada, and those that were known within the professional network  
29 of the study team. This recruitment approach might have excluded practice perspectives more  
30 representative of other countries or service delivery systems. The scope of the study is further  
31 limited by the choice to focus on sensory health professionals, without including additional  
32 stakeholders. A parallel study is currently exploring the opinions of nurses working in LTCHs;  
33 however, including caregivers or primary care providers would provide further insights. The  
34 data-driven analysis approach revealed that the majority of strategies and tools mentioned were  
35 in the hearing domain, which is intuitively more closely linked to communication. Future studies  
36 may need to probe further into the use and usability of vision testing devices and strategies. They  
37 should provide additional background data on the participants that will allow for a better  
38 contextualization of the findings. For example, the frequency and intensity of service delivery by  
39  
40  
41  
42  
43  
44  
45  
46  
47  
48  
49  
50  
51  
52  
53  
54  
55  
56  
57  
58  
59  
60

1  
2  
3 the participating stakeholders would provide information about the level of expertise and  
4  
5 experience in service delivery and strategy development. In addition, this limitation may also  
6  
7 have had an effect on data saturation.  
8  
9

10 A remaining challenge is to reconcile the realities of nurses workloads in LTCHs with the  
11  
12 recommendations that have emerged from our specialist interviews. Specifically, the  
13  
14 recommendations of our vision and hearing care professionals are likely to go beyond the  
15  
16 resources available. Even though both groups agree that increased priority should be placed on  
17  
18 the sensory assessment of residents in order to improve communication [40], the reality of  
19  
20 service provision in LTCHs rarely allows for this level of individualized attention [63]. For  
21  
22 nurses working in LTCHs, the impact of regulations on nurse role flexibility and professional judgment  
23  
24 and an underfunded system contributing to insufficient resources and staffing [55] which influences their  
25  
26 ability to find time and resources to screen effectively. In addition, the technologies, tools and  
27  
28 abilities available versus the devices, techniques and skills that were recommended may not  
29  
30 match. For example, LTCH nurses may not have access to the necessary tools and training to  
31  
32 remove earwax, a potentially necessary step before hearing can truly be evaluated. Similarly,  
33  
34 pocket-sized eye charts may be necessary for vision screening, but may not necessarily be  
35  
36 available to all staff at any time, or staff may lack training to properly administer and interpret  
37  
38 the results when presenting the test at a specific distance or under non-optimal lighting  
39  
40 conditions. Previous research has provided educational content on vision- and hearing screening,  
41  
42 specifically with LTCH in mind [64–66]; however, knowledge transfer and implementation  
43  
44 appear to still be lacking. Meanwhile, some of the tests that may be known and available to  
45  
46 nurses may not hold up to the demands of rigor for sensory testing by the specialists. For  
47  
48 example, the use of measures such as the Whisper test and Finger Rub test that are evidenced as  
49  
50  
51  
52  
53  
54  
55  
56  
57  
58  
59  
60

1  
2  
3 suitable tests in the literature [67] did not find the approval of the specialists in our study, given  
4  
5 problems with standardization and validation.  
6

7  
8 The next steps in the development of a sensory screening tool for older adults with  
9  
10 dementia will include the integration of nurses' recommendations [31] with recommendations  
11  
12 from the experts who were interviewed for this environmental scan, as well as the results of a  
13  
14 systematic review of the literature on this topic. The members of this research team will then  
15  
16 develop and pilot test a screening tool for nurses to use in the LTCH to examine its feasibility,  
17  
18 reliability and validity. The present data indicate that strategies and training in easy-to-use  
19  
20 methods, as well as careful client observation, may play a prominent role in such a screening  
21  
22 tool. It is also possible that these methods and adaptive strategies may take shape in a new  
23  
24 technological application, which can be incorporated into portable devices such as cellphones or  
25  
26 a tablet computer - both technologies that are becoming more available in the clinical  
27  
28 environment [68,69]. Mandated training on the use of such a screening tool and continuous  
29  
30 efforts in knowledge translation would ensure its success, especially given its potential for far-  
31  
32 reaching benefits to clients and clinicians alike in their care provision and interaction in LTCHs.  
33  
34  
35  
36  
37  
38  
39  
40  
41  
42  
43  
44  
45  
46  
47  
48  
49  
50  
51  
52  
53  
54  
55  
56  
57  
58  
59  
60

1  
2  
3 **Contributors:** KSMcG is responsible for project conception and along with FH and WW for  
4 writing the protocol. FH, KSMcG and WW obtained ethics approval. FH collected the data. WW  
5 and JJ conducted the data analysis. WW, FH, JJ and KSMcG were involved in data  
6 interpretation, writing, editing and revising the manuscript.  
7  
8  
9  
10  
11  
12  
13

14 **Competing interests:** none declared  
15  
16  
17  
18

19 **Funding:** This work was supported by the Alzheimer Society Research Programme (ASRP),  
20 Alzheimer Society of Canada; grant number RG 16-08. WW is supported by an FRQ-S Junior 1  
21 career award (# 28881 & 30620).  
22  
23  
24  
25  
26  
27

28 **Data sharing statement:** The complete transcripts of all qualitative data are stored with Walter  
29 Wittich. Pending additional ethics approval, these data can be accessed through the authors of  
30 this article.  
31  
32  
33  
34  
35  
36  
37  
38  
39  
40  
41  
42  
43  
44  
45  
46  
47  
48  
49  
50  
51  
52  
53  
54  
55  
56  
57  
58  
59  
60

1  
2  
3 **Table 1: Interview Questions**  
4  
5

- 6
- 7 • Do you administer hearing and vision screening tests to residents at this facility?
  - 8 • How long have you been working with persons who have dementia?
  - 9 • Please describe your experience of working with persons who have dementia, as well as persons  
10 with hearing and vision loss.
  - 11 • How do you differentiate between residents who have difficulty understanding due to a hearing  
12 impairment and those with cognitive impairments?
  - 13 • How are residents identified as being in need of assessment for vision and hearing impairment?  
14 – Is there a standard procedure in place, and, if so, what are the steps?  
15 – What is the procedure for referring residents to a hearing and/or vision specialist?
  - 16 • What tools, technologies, and strategies are you currently using to assess and/or detect vision  
17 and/or hearing in persons who have dementia?
  - 18 • What approach is used or do you use in assessing persons who have dementia e.g. what  
19 combination of tools, technologies, and strategies is being implemented?
  - 20 • How do these tools, technologies, and strategies identify a person as having hearing and/or  
21 vision impairments?
  - 22 • What are the facilitators and barriers in implementing this approach and/or procedure?  
23 – Please list all the challenges in using these tools, technologies, and strategies.  
24 – Please also list all the benefits to using these tools, technologies, and strategies.
  - 25 • In what way can these tools, technologies, and strategies be improved?
  - 26 • In your opinion, what are the key elements to include in a hearing and vision screening package  
27 for persons who have dementia?
  - 28 • Do you have knowledge of or experience in using either of the following:  
29 – **Peek** application (turns a smartphone into an eye exam tool)?  
30 ...or similar other apps?  
31 – **uHear** application (downloadable audiometer on to an iPod Touch as a test for hearing  
32 loss)?  
33 ...or similar other apps?  
34  
35  
36  
37  
38  
39  
40  
41  
42  
43  
44  
45  
46  
47  
48  
49  
50  
51  
52  
53  
54  
55  
56  
57  
58  
59  
60

**Table 2: Summary of Participant Characteristics (N=11)**

| <b>Categorical Characteristics</b> | <b>N</b> | <b>[%]</b> |
|------------------------------------|----------|------------|
| Audiologist                        | 2        | 18         |
| Optometrist                        | 4        | 36         |
| Speech-Language Pathologist        | 1        | 9          |
| Dual-sensory specialist            | 2        | 18         |
| Hearing counsellor                 | 1        | 9          |
| Health technology specialist       | 1        | 9          |
| Female                             | 10       | 91         |

---

| <b>Continuous Characteristics</b>                |       |             |
|--------------------------------------------------|-------|-------------|
| Years' experience working in dementia care (N=8) | 14.56 | [SD= 12.03] |

Table 3. Tools and Strategies for vision and hearing screening with older adults affected by dementia, as recommended by sensory specialists.

|            | HEARING SCREENING                                                                                                                                                                                                                                                                                                                                                                                                                                                                                                                                                                                                                                                                                                                                                                                                                                                                                                                                                                                                                                                                                                                                                                                                                                                              | VISION SCREENING                                                                                                                                                                                                                                                                                                                                                                                                                                                                          |
|------------|--------------------------------------------------------------------------------------------------------------------------------------------------------------------------------------------------------------------------------------------------------------------------------------------------------------------------------------------------------------------------------------------------------------------------------------------------------------------------------------------------------------------------------------------------------------------------------------------------------------------------------------------------------------------------------------------------------------------------------------------------------------------------------------------------------------------------------------------------------------------------------------------------------------------------------------------------------------------------------------------------------------------------------------------------------------------------------------------------------------------------------------------------------------------------------------------------------------------------------------------------------------------------------|-------------------------------------------------------------------------------------------------------------------------------------------------------------------------------------------------------------------------------------------------------------------------------------------------------------------------------------------------------------------------------------------------------------------------------------------------------------------------------------------|
| TOOLS      | <ul style="list-style-type: none"> <li>▪ "Hear Mans" (manikin head with headphones on used for a quick hearing test)</li> <li>▪ Asking simple questions (does the patient wear hearing aids? does the patient have them?)</li> <li>▪ Chart review</li> <li>▪ Five-minute hearing test</li> <li>▪ Hearing Dependent Daily Activities questionnaire</li> <li>▪ Otoacoustic emissions</li> <li>▪ Picture board</li> <li>▪ Pocket Talker (how the person responds to using it)</li> <li>▪ Pure-tone audiology</li> <li>▪ Questionnaire devised by a former student of the interviewee's</li> <li>▪ Repeating numbers</li> <li>▪ Speech testing</li> <li>▪ Whisper test and finger rub</li> </ul>                                                                                                                                                                                                                                                                                                                                                                                                                                                                                                                                                                                   | <ul style="list-style-type: none"> <li>▪ Auto-refractor</li> <li>▪ Case history</li> <li>▪ Finger counting</li> <li>▪ Health questionnaire</li> <li>▪ Matching game</li> <li>▪ Objective measures (prescription assessment, eye exam)</li> <li>▪ Sentences on a board in different sized font</li> <li>▪ Vision questionnaire</li> <li>▪ Visual charts (letters, numbers, sentences, single words, pictures, tumbling Es)</li> </ul>                                                      |
| STRATEGIES | <ul style="list-style-type: none"> <li>▪ Ensure that cerumen (ear wax) has been removed</li> <li>▪ Alternating between testing the left and right ear until you get an answer if no initial response to pitch testing</li> <li>▪ Applying techniques developed for screening in children</li> <li>▪ Asking basic questions as a form of hearing screening</li> <li>▪ Bowing out of the screening gracefully if it could not be finished</li> <li>▪ Choosing more meaningful stimuli than pure tones</li> <li>▪ Choosing "pulsing beeps" instead of "single beeps" on the audiometer</li> <li>▪ Choosing a quiet room</li> <li>▪ Educating nurses and doctors on the importance of hearing and screening</li> <li>▪ Frequently encouraging the client</li> <li>▪ Gradually reducing the level of stimulus presentation to find their threshold</li> <li>▪ Repeating measurements to ensure reliability of client self-report</li> <li>▪ Rephrasing screening questions to avoid denial of the problem</li> <li>▪ Starting with speech testing</li> <li>▪ Taking breaks as needed</li> <li>▪ Using a headset instead of ear buds</li> <li>▪ Using ear buds instead of a headset</li> <li>▪ Using sound amplification (e.g. Pocket Talker) to facilitate communication</li> </ul> | <ul style="list-style-type: none"> <li>▪ Bringing the eye chart closer than normal</li> <li>▪ Distributing a vision form for caregiver to request exam or to help staff look at changes that would warrant a screening</li> <li>▪ Emphasizing that the purpose of the screening is to monitor the health of the individual</li> <li>▪ Respecting their autonomy during the screening</li> <li>▪ Staying away from the patient and moving around them with portable instruments</li> </ul> |

#### References:

- 1 Cruickshanks K, Wiley T, Tweed B, *et al.* The prevalence of hearing loss in older adults in Beaver Dam, Wisconsin: The epidemiology of hearing loss study. *Am J Epidemiol* 1998;**148**:879–85.<http://aje.oxfordjournals.org/content/148/9/879.full.pdf>
- 2 Crews JE, Campbell VA, John E, *et al.* Vision impairment and hearing loss among



- community-dwelling older Americans: implications for health and functioning. *Am J Public Health* 2004;**94**:823–9.
- 3 Swenor BK, Ramulu PY, Willis JR, *et al.* The Prevalence of Concurrent Hearing and Vision Impairment in the United States. *JAMA Intern Med* 2013;**173**:1–5. doi:10.1001/jamainternmed.2013.1880
- 4 Prince M, Knapp M, Guerchet M, *et al.* *Dementia UK: Update*. London, UK: 2014. www.cfas.ac.uk/files/2015/07/P326\_AS\_Dementia\_Report\_WEB2.pdf
- 5 Hebert LE, Weuve J, Scherr PA, *et al.* Alzheimer disease in the United States (2010–2050) estimated using the 2010 census. *Neurology* 2013;**80**:1778–83. doi:10.1212/WNL.0b013e31828726f5
- 6 Gold M, Lightfoot LA, Hnath-Chisolm T. Hearing loss in a memory disorders clinic. A specially vulnerable population. *Arch Neurol* 1996;**53**:922–8. <http://www.ncbi.nlm.nih.gov/pubmed/8815858> (accessed 24 Aug 2017).
- 7 Taljaard DS, Olaithe M, Brennan-Jones CG, *et al.* The relationship between hearing impairment and cognitive function: a meta-analysis in adults. *Clin Otolaryngol* 2016;**41**:718–29. doi:10.1111/coa.12607
- 8 Bowen M, Edgar DF, Hancock B, *et al.* *The Prevalence of Visual Impairment in People with Dementia (the ProVIDE study): a cross-sectional study of people aged 60–89 years with dementia and qualitative exploration of individual, carer and professional perspectives*. NIHR Journals Library 2016. doi:10.3310/HSDR04210
- 9 Livingston G, Sommerlad A, Orgeta V, *et al.* Dementia prevention, intervention, and care. *Lancet* 2017;**6736**. doi:10.1016/S0140-6736(17)31363-6
- 10 Hardy CJD, Marshall CR, Golden HL, *et al.* Hearing and dementia. *J Neurol* 2016;**263**:2339–54. doi:10.1007/s00415-016-8208-y
- 11 Cronin-Golomb A, Corkin S, Growdon JH. Visual dysfunction predicts cognitive deficits in Alzheimer’s disease. *Optom Vis Sci* 1995;**72**:168–76. <http://www.ncbi.nlm.nih.gov/pubmed/7609939> (accessed 24 Aug 2017).
- 12 Mentis MJ, Horwitz B, Grady CL, *et al.* Visual cortical dysfunction in Alzheimer’s disease evaluated with a temporally graded ‘stress test’ during PET. *Am J Psychiatry* 1996;**153**:32–40. doi:10.1176/ajp.153.1.32
- 13 Wayne R V, Johnsrude IS. A review of causal mechanisms underlying the link between age-related hearing loss and cognitive decline. *Ageing Res Rev* 2015;**23**:154–66. doi:10.1016/j.arr.2015.06.002
- 14 Panza F, Solfrizzi V, Seripa D, *et al.* Age-related hearing impairment and frailty in Alzheimer’s disease: interconnected associations and mechanisms. *Front Aging Neurosci* 2015;**7**. doi:10.3389/fnagi.2015.00113
- 15 Logroscino G, Panza F. The Role of Hearing Impairment in Cognitive Decline: Need for the Special Sense Assessment in Evaluating Cognition In Older Age. *Neuroepidemiology* 2016;**46**:290–1. doi:10.1159/000445988
- 16 Panza F, Seripa D, Solfrizzi V, *et al.* Targeting Cognitive Frailty: Clinical and Neurobiological Roadmap for a Single Complex Phenotype. *J Alzheimer’s Dis* 2015;**47**:793–813. doi:10.3233/JAD-150358
- 17 Allen NH, Burns A, Newton V, *et al.* The effects of improving hearing in dementia. *Age Ageing* 2003;**32**:189–93.
- 18 Whitson HE, Whitaker D, Potter G, *et al.* A low-vision rehabilitation program for patients with mild cognitive deficits. *JAMA Ophthalmol* 2013;**131**:912–9.

- doi:10.1001/jamaophthalmol.2013.1700
- 19 Castiglione A, Benatti A, Velardita C, *et al.* Aging, Cognitive Decline and Hearing Loss: Effects of Auditory Rehabilitation and Training with Hearing Aids and Cochlear Implants on Cognitive Function and Depression among Older Adults. *Audiol Neurootol* 2016;**21** Suppl 1:21–8. doi:10.1159/000448350
- 20 Mosnier I, Bebear J-P, Marx M, *et al.* Improvement of Cognitive Function After Cochlear Implantation in Elderly Patients. *JAMA Otolaryngol Neck Surg* 2015;**141**:1–9. doi:10.1001/jamaoto.2015.129
- 21 Hébert R, Dubois MF, Wolfson C, *et al.* Factors associated with long-term institutionalization of older people with dementia: data from the Canadian Study of Health and Aging. *J Gerontol A Biol Sci Med Sci* 2001;**56**:M693-9. <http://www.ncbi.nlm.nih.gov/pubmed/11682577> (accessed 25 Aug 2017).
- 22 Severson MA, Smith GE, Tangalos EG, *et al.* Patterns and predictors of institutionalization in community-based dementia patients. *J Am Geriatr Soc* 1994;**42**:181–5. <http://www.ncbi.nlm.nih.gov/pubmed/8126333> (accessed 25 Aug 2017).
- 23 Steele C, Rovner B, Chase GA, *et al.* Psychiatric symptoms and nursing home placement of patients with Alzheimer's disease. *Am J Psychiatry* 1990;**147**:1049–51. doi:10.1176/ajp.147.8.1049
- 24 Yamada Y, Vlachova M, Richter T, *et al.* Prevalence and Correlates of Hearing and Visual Impairments in European Nursing Homes: Results From the SHELTER Study. *J Am Med Dir Assoc* 2014;**15**:738–43. doi:10.1016/j.jamda.2014.05.012
- 25 Sinoo MM, Kort HSM, Duijnste MSH. Visual functioning in nursing home residents: information in client records. *J Clin Nurs* 2012;**21**:1913–21. doi:10.1111/j.1365-2702.2012.04128.x
- 26 Wattamwar K, Qian ZJ, Otter J, *et al.* Increases in the Rate of Age-Related Hearing Loss in the Older Old. *JAMA Otolaryngol Neck Surg* 2017;**143**:41. doi:10.1001/jamaoto.2016.2661
- 27 Overbury O, Wittich W. Barriers to low vision rehabilitation: the Montreal Barriers Study. *Investig Ophthalmol Vis Sci* 2011;**52**:8933–8. doi:10.1167/iovs.11-8116
- 28 The College of Optometrists. The Visual Impairment and Dementia Summit. 2016.
- 29 Slaughter SE, Hopper T, Ickert C, *et al.* Identification of hearing loss among residents with dementia: Perceptions of health care aides. *Geriatr Nurs (Minneap)* 2014;**35**:434–40. doi:10.1016/j.gerinurse.2014.07.001
- 30 Labreche T, Stolee P, McLeod J. An optometrist-led eye care program for older residents of retirement homes and long-term care facilities. *Can Geriatr J* 2011;**14**:8–11. <http://www.ncbi.nlm.nih.gov/pubmed/23251304> (accessed 25 Aug 2017).
- 31 Höbler F, Argueta-Warden X, Rodríguez Monforte M, *et al.* Exploring the sensory screening experiences of nurses working in long-term care homes with residents who have dementia: a qualitative study. *BMC Geriatr* 2017.
- 32 Humes LE, Busey TA, Craig J, *et al.* Are age-related changes in cognitive function driven by age-related changes in sensory processing? *Attention, Perception, Psychophys* 2013;**75**:508–24. doi:10.3758/s13414-012-0406-9
- 33 Lin F, Yaffe K, Xia J, *et al.* Hearing Loss and Cognitive Decline in Older Adults. *JAMA Intern Med* 2013;**173**:293. doi:10.1001/jamainternmed.2013.1868
- 34 Lin F, Albert M. Hearing loss and dementia – who is listening? *Aging Ment Health* 2014;**18**:671–3. doi:10.1080/13607863.2014.915924

- 1  
2  
3 35 Gallacher J, Ilubaera V, Ben-Shlomo Y, *et al.* Auditory threshold, phonologic demand,  
4 and incident dementia. *Neurology* 2012;**79**:1583–90.  
5 doi:10.1212/WNL.0b013e31826e263d  
6  
7 36 Lin F, Metter EJ, O'Brien RJ, *et al.* Hearing loss and incident dementia. *Arch Neurol*  
8 2011;**68**:214–20. doi:10.1001/archneurol.2010.362  
9  
10 37 Yamada Y, Denking MD, Onder G, *et al.* Dual Sensory Impairment and Cognitive  
11 Decline: The Results From the Shelter Study. *Journals Gerontol Ser A Biol Sci Med Sci*  
12 2015;**71**:1–7. doi:10.1093/gerona/glv036  
13  
14 38 Parfyonov M, Mick P, Pichora-Fuller M, *et al.* Association between sensory loss and  
15 social outcomes: A preliminary report. *Can Acoust* 2016;**44**:124–5.  
16  
17 39 Mick P, Pichora-Fuller MK. Is Hearing Loss Associated with Poorer Health in Older  
18 Adults Who Might Benefit from Hearing Screening? *Ear Hear* 2016;**37**:e194–201.  
19 doi:10.1097/AUD.0000000000000267  
20  
21 40 Pryce H, Goberman-Hill R. 'There's a hell of a noise': living with a hearing loss in  
22 residential care. *Age Ageing* 2012;**41**:40–6. doi:10.1093/ageing/afr112  
23  
24 41 Mitoku K, Masaki N, Ogata Y, *et al.* Vision and hearing impairments, cognitive  
25 impairment and mortality among long-term care recipients: a population-based cohort  
26 study. *BMC Geriatr* 2016;**16**:112. doi:10.1186/s12877-016-0286-2  
27  
28 42 Pye A, Charalambous AP, Leroi I, *et al.* Screening tools for the identification of dementia  
29 for adults with age-related acquired hearing or vision impairment: a scoping review. *Int*  
30 *Psychogeriatrics* 2017;:1–14. doi:10.1017/S104161021700120X  
31  
32 43 Bertone A, Wittich W, Watanabe DH, *et al.* The effect of age-related macular  
33 degeneration on non-verbal neuropsychological test performance. *Int Congr Ser*  
34 2005;**1282**:26–30.  
35  
36 44 Wechsler D. *WAIS-III: Wechsler Adult Intelligence Scale (3rd ed.) Administration and*  
37 *Scoring Manual*. San Antonio, TX: : Psychological Corporation/Harcourt Brace 1997.  
38  
39 45 Wittich W, Phillips N, Nasreddine ZS, *et al.* Sensitivity and Specificity of the Montreal  
40 Cognitive Assessment Modified for Individuals Who Are Visually Impaired. *J Vis Impair*  
41 *Blind* 2010;**104**:360–8.  
42  
43 46 Nasreddine ZS, Phillips NA, Bedirian V, *et al.* The Montreal Cognitive Assessment,  
44 MoCA: a brief screening tool for mild cognitive impairment. *J Am Geriatr Soc*  
45 2005;**53**:695–  
46 9.[http://www.ncbi.nlm.nih.gov/entrez/query.fcgi?cmd=Retrieve&db=PubMed&dopt=Citation&list\\_uids=15817019](http://www.ncbi.nlm.nih.gov/entrez/query.fcgi?cmd=Retrieve&db=PubMed&dopt=Citation&list_uids=15817019)  
47  
48 47 Lin VYWW, Chung J, Callahan BL, *et al.* Development of cognitive screening test for the  
49 severely hearing impaired: Hearing-impaired MoCA. *Laryngoscope* 2017;**127**:S4–11.  
50 doi:10.1002/lary.26590  
51  
52 48 Kergoat H, Law C, Chriqui E, *et al.* Tool for Screening Visual Acuity in Older Individuals  
53 With Dementia. *Am J Alzheimer's Dis Other Dementias*® 2017;**32**:96–100.  
54 doi:10.1177/1533317517689877  
55  
56 49 Roets-Merken LM, Zuidema SU, Vernooij-Dassen MJFJ, *et al.* Screening for hearing,  
57 visual and dual sensory impairment in older adults using behavioural cues: A validation  
58 study. *Int J Nurs Stud* 2014;**51**:1434–40. doi:10.1016/j.ijnurstu.2014.02.006  
59  
60 50 McGilton KS, Höbler F, Campos J, *et al.* Hearing and vision screening tools for long-term  
61 care residents with dementia: protocol for a scoping review. *BMJ Open* 2016;**6**:e011945.  
62 doi:10.1136/bmjopen-2016-011945

- 1  
2  
3 51 Graham P, Evitts T, Thomas-MacLean R. Environmental scans: how useful are they for  
4 primary care research? *Can Fam Physician* 2008;**54**:1022–  
5 3.<http://www.ncbi.nlm.nih.gov/pubmed/18625830> (accessed 19 Nov 2017).
- 6 52 Rowel R, Moore ND, Nowrojee S, *et al.* The utility of the environmental scan for public  
7 health practice: lessons from an urban program to increase cancer screening. *J Natl Med*  
8 *Assoc* 2005;**97**:527–34.<http://www.ncbi.nlm.nih.gov/pubmed/15868772> (accessed 19 Nov  
9 2017).
- 10 53 Williams JR. The Declaration of Helsinki and public health. *Bull World Health Organ*  
11 2008;**86**:650–1.
- 12 54 Sibbald SL, McPherson C, Kothari A. Ontario primary care reform and quality  
13 improvement activities: an environmental scan. *BMC Health Serv Res* 2013;**13**:209.  
14 doi:10.1186/1472-6963-13-209
- 15 55 McGilton KS, Boscart VM, Brown M, *et al.* Making tradeoffs between the reasons to  
16 leave and reasons to stay employed in long-term care homes: Perspectives of licensed  
17 nursing staff. *Int J Nurs Stud* 2014;**51**:917–26. doi:10.1016/j.ijnurstu.2013.10.015
- 18 56 Whiting LS. Semi-structured interviews: guidance for novice researchers. *Nurs Stand*  
19 2008;**22**:35–40. doi:10.7748/ns2008.02.22.23.35.c6420
- 20 57 Graneheim UH, Lundman B. Qualitative content analysis in nursing research: concepts,  
21 procedures and measures to achieve trustworthiness. *Nurse Educ Today* 2004;**24**:105–12.  
22 doi:10.1016/j.nedt.2003.10.001
- 23 58 Hall W a, Long B, Bermbach N, *et al.* Qualitative teamwork issues and strategies:  
24 coordination through mutual adjustment. *Qual Health Res* 2005;**15**:394–410.  
25 doi:10.1177/1049732304272015
- 26 59 Wittich W, Southall K. Coping with extended facedown positioning after macular hole  
27 surgery: a qualitative diary analysis. *Nurs Res* 2008;**57**:436–  
28 43.[http://www.ncbi.nlm.nih.gov/entrez/query.fcgi?cmd=Retrieve&db=PubMed&dopt=Cit  
29 ation&list\\_uids=19018218](http://www.ncbi.nlm.nih.gov/entrez/query.fcgi?cmd=Retrieve&db=PubMed&dopt=Citation&list_uids=19018218)
- 30 60 Wittich W, Barstow EA, Jarry J, *et al.* Screening for sensory impairment in older adults:  
31 Training and practice of occupational therapists in Quebec. *Can J Occup Ther*  
32 2015;**82**:283–93. doi:10.1177/0008417415573076
- 33 61 Wittich W, Jarry J, Barstow E, *et al.* Vision and hearing impairment and occupational  
34 therapy education: Needs and current practice. *Br J Occup Ther* 2017;:30802261668485.  
35 doi:10.1177/0308022616684853
- 36 62 Wittich W, Jarry J, Groulx G, *et al.* Rehabilitation and Research Priorities in  
37 Deafblindness for the Next Decade. *J Vis Impair Blind* 2016;**110**:219–31.
- 38 63 Viau-Guay A, Bellemare M, Feillou I, *et al.* Person-Centered Care Training in Long-Term  
39 Care Settings: Usefulness and Facility of Transfer into Practice. *Can J Aging / La Rev Can*  
40 *du Vieil* 2013;**32**:57–72. doi:10.1017/S0714980812000426
- 41 64 Duffy M, Beliveau-Tobey M, De l'Aune W. Reaching Visually Impaired Elders in  
42 Longterm Care: A selfstudy Curriculum for Care Providers. *J Vis Impair Blind*  
43 1995;**89**:368–75.
- 44 65 Watson GR. Low vision in the geriatric population: rehabilitation and management. *J Am*  
45 *Geriatr Soc* 2001;**49**:317–30. doi:10.1046/j.1532-5415.2001.4930317.x
- 46 66 Worrall L, Hickson L, Dodd B. Screening for Communication Impairment in Nursing  
47 Homes and Hostels. *Aust J Hum Commun Disord* 1994;**21**:53–64.
- 48 67 Strawbridge WJ, Wallhagen MI. Simple Tests Compare Well with a Hand-held  
49  
50  
51  
52  
53  
54  
55  
56  
57  
58  
59  
60

1  
2  
3 Audiometer for Hearing Loss Screening in Primary Care. *J Am Geriatr Soc* Published  
4 Online First: 11 August 2017. doi:10.1111/jgs.15044

5  
68 Berkowitz SJ, Kung JW, Eisenberg RL, *et al.* Resident iPad Use: Has It Really Changed  
7 the Game? *J Am Coll Radiol* 2014;**11**:180–4. doi:10.1016/j.jacr.2013.04.017

8  
69 Lehnbohm EC, Adams K, Day RO, *et al.* iPad use during ward rounds: an observational  
9 study. *Stud Health Technol Inform* 2014;**204**:67–  
10 73. <http://www.ncbi.nlm.nih.gov/pubmed/25087529> (accessed 29 Aug 2017).  
11  
12  
13  
14  
15  
16  
17  
18  
19  
20  
21  
22  
23  
24  
25  
26  
27  
28  
29  
30  
31  
32  
33  
34  
35  
36  
37  
38  
39  
40  
41  
42  
43  
44  
45  
46  
47  
48  
49  
50  
51  
52  
53  
54  
55  
56  
57  
58  
59  
60



## COREQ (CONsolidated criteria for REporting Qualitative research) Checklist

A checklist of items that should be included in reports of qualitative research. You must report the page number in your manuscript where you consider each of the items listed in this checklist. If you have not included this information, either revise your manuscript accordingly before submitting or note N/A.

| Topic                                          | Item No. | Guide Questions/Description                                                                                                                              | Reported on Page No. |
|------------------------------------------------|----------|----------------------------------------------------------------------------------------------------------------------------------------------------------|----------------------|
| <b>Domain 1: Research team and reflexivity</b> |          |                                                                                                                                                          |                      |
| <i>Personal characteristics</i>                |          |                                                                                                                                                          |                      |
| Interviewer/facilitator                        | 1        | Which author/s conducted the interview or focus group?                                                                                                   | 7                    |
| Credentials                                    | 2        | What were the researcher's credentials? E.g. PhD, MD                                                                                                     | 7                    |
| Occupation                                     | 3        | What was their occupation at the time of the study?                                                                                                      | 7                    |
| Gender                                         | 4        | Was the researcher male or female?                                                                                                                       | 7                    |
| Experience and training                        | 5        | What experience or training did the researcher have?                                                                                                     | 7                    |
| <i>Relationship with participants</i>          |          |                                                                                                                                                          |                      |
| Relationship established                       | 6        | Was a relationship established prior to study commencement?                                                                                              | 7                    |
| Participant knowledge of the interviewer       | 7        | What did the participants know about the researcher? e.g. personal goals, reasons for doing the research                                                 | 7                    |
| Interviewer characteristics                    | 8        | What characteristics were reported about the interviewer/facilitator? e.g. Bias, assumptions, reasons and interests in the research topic                | 7                    |
| <b>Domain 2: Study design</b>                  |          |                                                                                                                                                          |                      |
| <i>Theoretical framework</i>                   |          |                                                                                                                                                          |                      |
| Methodological orientation and Theory          | 9        | What methodological orientation was stated to underpin the study? e.g. grounded theory, discourse analysis, ethnography, phenomenology, content analysis | 7                    |
| <i>Participant selection</i>                   |          |                                                                                                                                                          |                      |
| Sampling                                       | 10       | How were participants selected? e.g. purposive, convenience, consecutive, snowball                                                                       | 7                    |
| Method of approach                             | 11       | How were participants approached? e.g. face-to-face, telephone, mail, email                                                                              | 7                    |
| Sample size                                    | 12       | How many participants were in the study?                                                                                                                 | 7                    |
| Non-participation                              | 13       | How many people refused to participate or dropped out? Reasons?                                                                                          | 8                    |
| <i>Setting</i>                                 |          |                                                                                                                                                          |                      |
| Setting of data collection                     | 14       | Where was the data collected? e.g. home, clinic, workplace                                                                                               | 7                    |
| Presence of non-participants                   | 15       | Was anyone else present besides the participants and researchers?                                                                                        | 7                    |
| Description of sample                          | 16       | What are the important characteristics of the sample? e.g. demographic data, date                                                                        | table 2              |
| <i>Data collection</i>                         |          |                                                                                                                                                          |                      |
| Interview guide                                | 17       | Were questions, prompts, guides provided by the authors? Was it pilot tested?                                                                            | table 1              |
| Repeat interviews                              | 18       | Were repeat interviews carried out? If yes, how many?                                                                                                    | n/a                  |
| Audio/visual recording                         | 19       | Did the research use audio or visual recording to collect the data?                                                                                      | 8                    |
| Field notes                                    | 20       | Were field notes made during and/or after the interview or focus group?                                                                                  | n/a                  |
| Duration                                       | 21       | What was the duration of the interviews or focus group?                                                                                                  | 8                    |
| Data saturation                                | 22       | Was data saturation discussed?                                                                                                                           | 17                   |
| Transcripts returned                           | 23       | Were transcripts returned to participants for comment and/or                                                                                             | n/a                  |

| Topic                                  | Item No. | Guide Questions/Description                                                                                                        | Reported on Page No. |
|----------------------------------------|----------|------------------------------------------------------------------------------------------------------------------------------------|----------------------|
|                                        |          | correction?                                                                                                                        |                      |
| <b>Domain 3: analysis and findings</b> |          |                                                                                                                                    |                      |
| <i>Data analysis</i>                   |          |                                                                                                                                    |                      |
| Number of data coders                  | 24       | How many data coders coded the data?                                                                                               | 8-9                  |
| Description of the coding tree         | 25       | Did authors provide a description of the coding tree?                                                                              | Table 3              |
| Derivation of themes                   | 26       | Were themes identified in advance or derived from the data?                                                                        | 9                    |
| Software                               | 27       | What software, if applicable, was used to manage the data?                                                                         | n/a                  |
| Participant checking                   | 28       | Did participants provide feedback on the findings?                                                                                 | n/a                  |
| <i>Reporting</i>                       |          |                                                                                                                                    |                      |
| Quotations presented                   | 29       | Were participant quotations presented to illustrate the themes/findings?<br>Was each quotation identified? e.g. participant number | 9-15                 |
| Data and findings consistent           | 30       | Was there consistency between the data presented and the findings?                                                                 | 9-15                 |
| Clarity of major themes                | 31       | Were major themes clearly presented in the findings?                                                                               | 9-15                 |
| Clarity of minor themes                | 32       | Is there a description of diverse cases or discussion of minor themes?                                                             | 9-15                 |

Developed from: Tong A, Sainsbury P, Craig J. Consolidated criteria for reporting qualitative research (COREQ): a 32-item checklist for interviews and focus groups. *International Journal for Quality in Health Care*. 2007. Volume 19, Number 6: pp. 349 – 357

**Once you have completed this checklist, please save a copy and upload it as part of your submission. DO NOT include this checklist as part of the main manuscript document. It must be uploaded as a separate file.**
